# Supplementary material
Source: publisher figshare collection journal article supplement (https://acs.figshare.com/ndownloader/files/4019182)

# Supporting Information

## Oxidative Heck Reaction of Glycals and Aryl Hydrazines: A Palladium-Catalyzed C-Glycosylation

Yaguang Bai, Le Mai Hoang Kim, Hongze Liao and Xue-Wei Liu\*

Division of Chemistry and Biological Chemistry, School of Physical & Mathematical Sciences, Nanyang Technological University, 21 Nanyang Link, 637371 Singapore

### Table of Contents:

|                                                            |   |
|------------------------------------------------------------|---|
| General information                                        | 2 |
| Synthesis of starting material <b>4a</b>                   | 2 |
| Copies of $^1\text{H}$ NMR and $^{13}\text{C}$ NMR spectra | 3 |

**General:** All the reactions were carried out in a flame or oven dried glassware with freshly distilled dry solvents under anhydrous conditions unless otherwise indicated. Organic solutions were concentrated under reduced pressure by rotary evaporation with a water bath (temperature below 40 °C). Reactions were magnetically stirred and monitored by thin-layer chromatography (TLC) carried out on 0.25 mm silica gel plates using UV light at 254 nm as a visualizing agent and a  $\text{KMnO}_4$  solution as stain. Product purification by flash column chromatography was accomplished using silica gel 60 (0.010–0.063 nm). Technical grade solvents were used for chromatography and were distilled prior to use. Optical rotations were measured in  $\text{CHCl}_3$  with a 1 cm cell ( $c$  given in g/100 mL). NMR spectra were recorded at room temperature on 400 MHz. The residual solvent signals were taken as the reference (7.26 ppm for  $^1\text{H}$  NMR spectra and 77.0 ppm for  $^{13}\text{C}$  NMR spectra in  $\text{CDCl}_3$ ). Sometimes the TMS signal at 0.0 ppm was used as an internal standard for  $^1\text{H}$  NMR spectra. Chemical shift ( $\delta$ ) is reported in ppm, coupling constants ( $J$ ) are given in Hz. The following abbreviations classify the multiplicity: s = singlet, d = doublet, t = triplet, m = multiplet or unresolved, br = broad signal. HR-MS (ESI) spectra were recorded on a Q-ToF mass spectrometer.

**Synthesis of 3-inverted acetyl glucal ((2R,3S,4S)-2-(acetoxymethyl)-3,4-dihydro-2H-pyran-3,4-diyl diacetate) from commercially available acetyl glucal ((2R,3S,4R)-2-(acetoxymethyl)-3,4-dihydro-2H-pyran-3,4-diyl diacetate)**

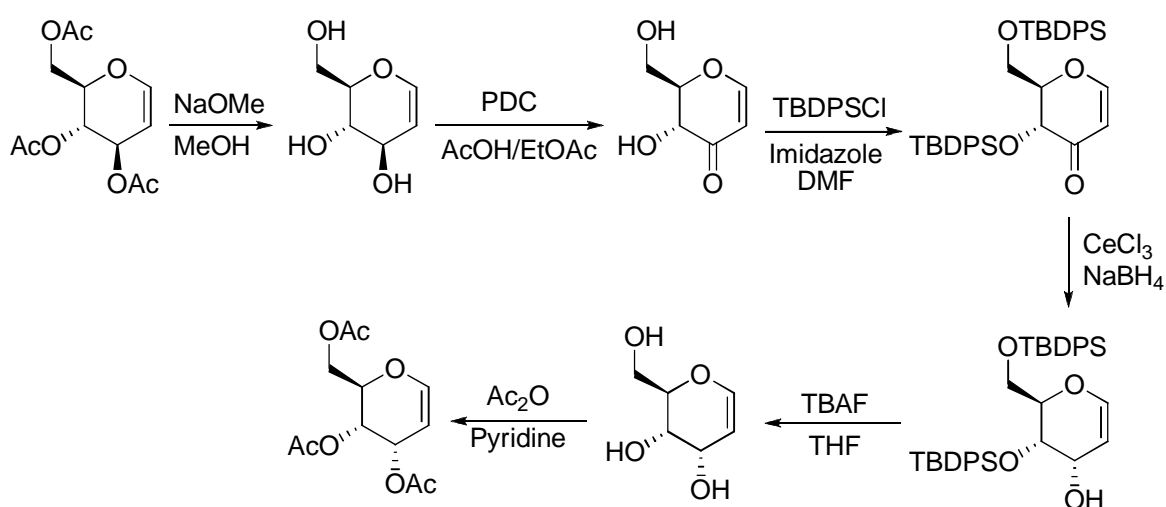

**Copies of  $^1\text{H}$  and  $^{13}\text{C}$  NMR spectrum**

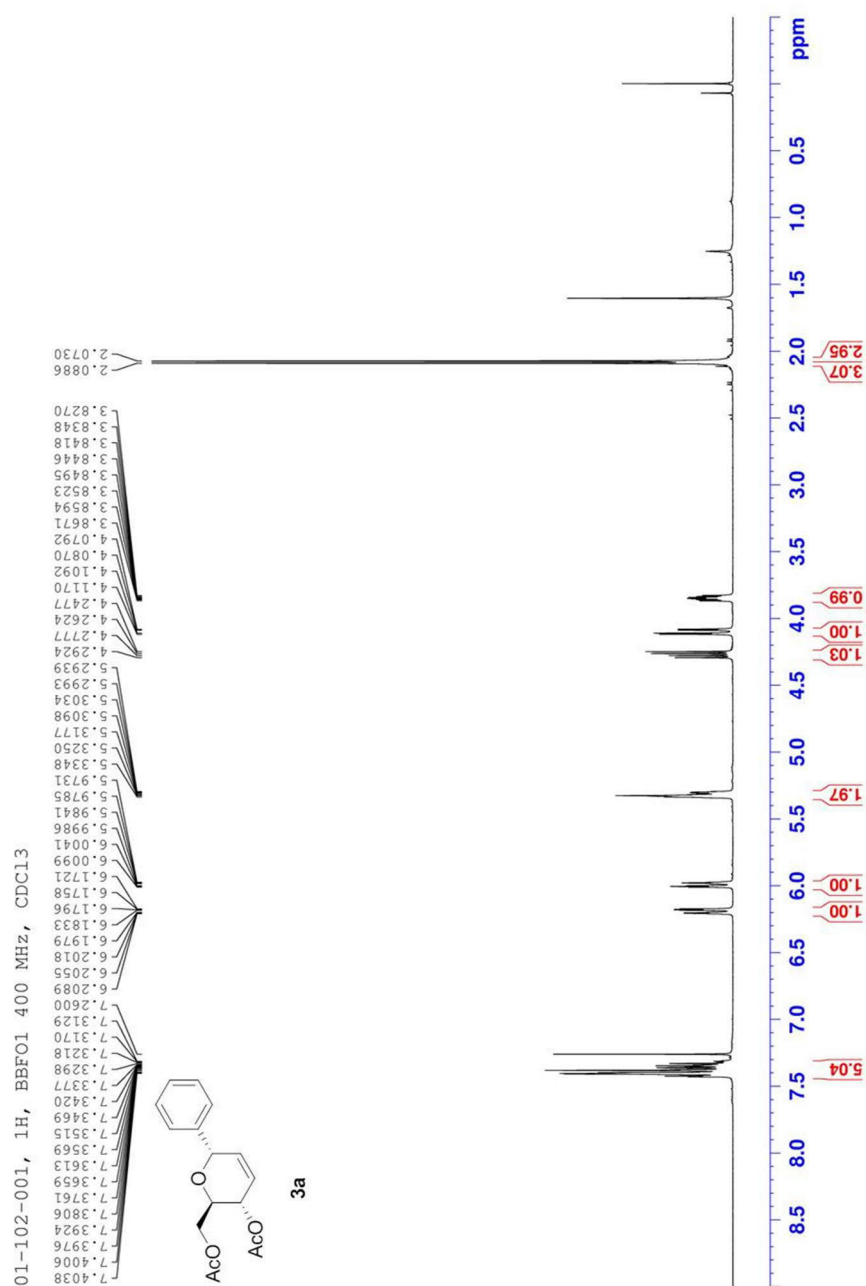

01-102-001, <sup>13</sup>C, BBO1 400 MHz, CDCl<sub>3</sub>

170.89  
170.49  
138.82  
131.48  
128.53  
128.25  
127.91  
125.02

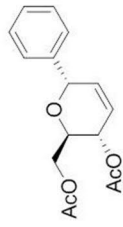

3a

73.73  
69.29  
65.02  
62.87

21.09  
20.82

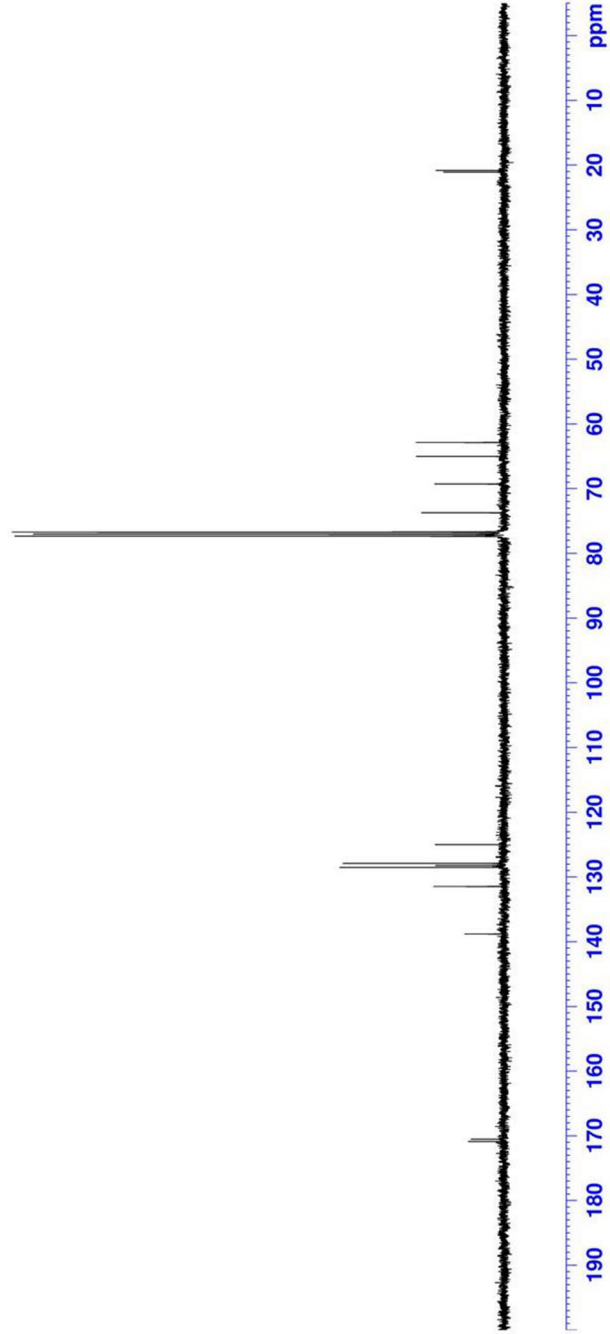

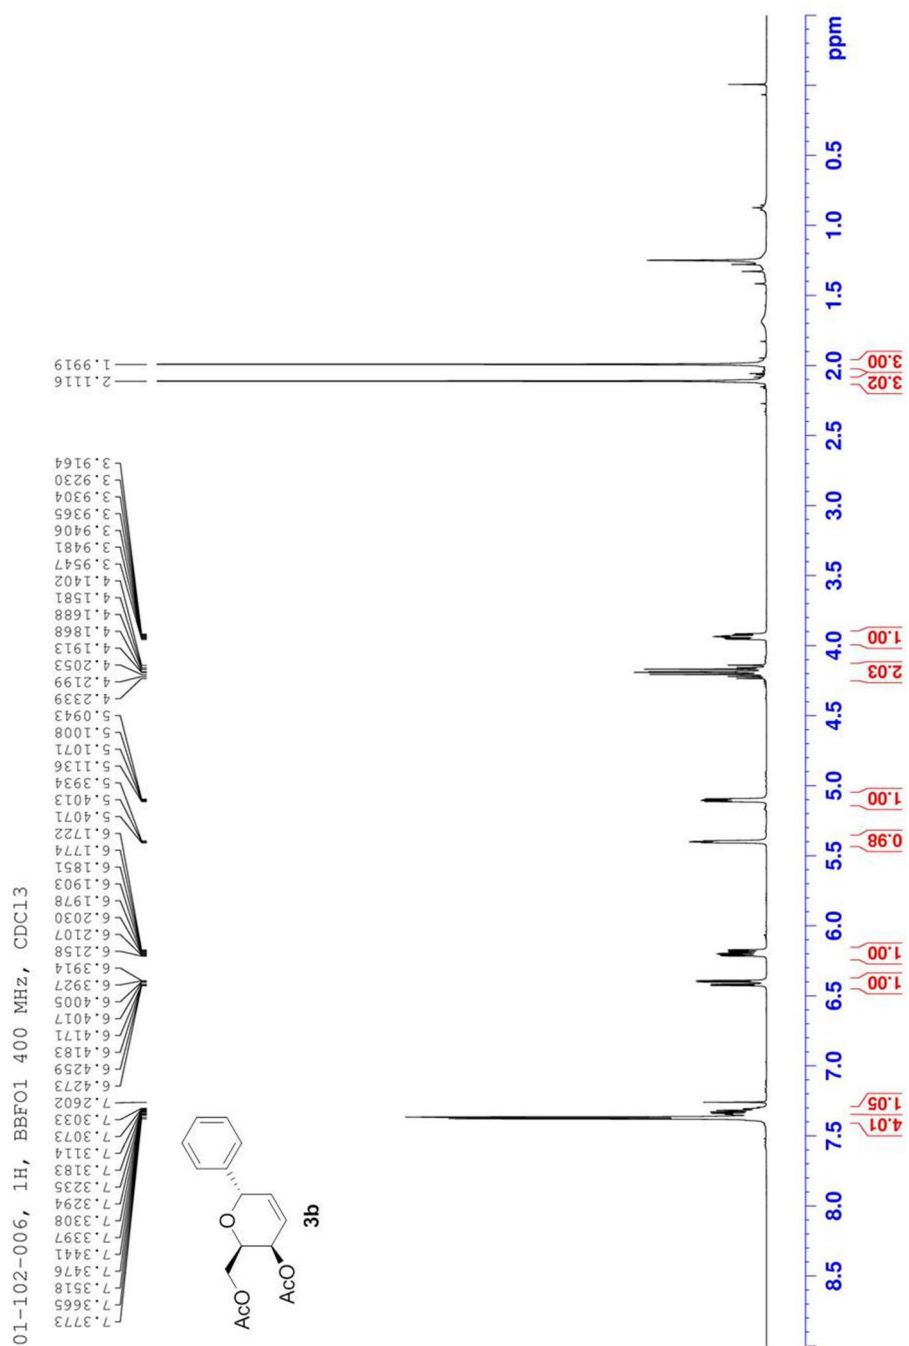

01-102-006, <sup>13</sup>C, BBO1 400 MHz, CDCl<sub>3</sub>

170.60  
170.56

138.29  
133.33  
128.49  
128.21  
127.76  
123.45

73.77  
68.30  
63.76  
62.75

20.94  
20.73

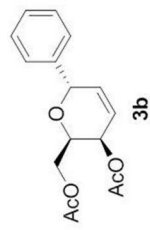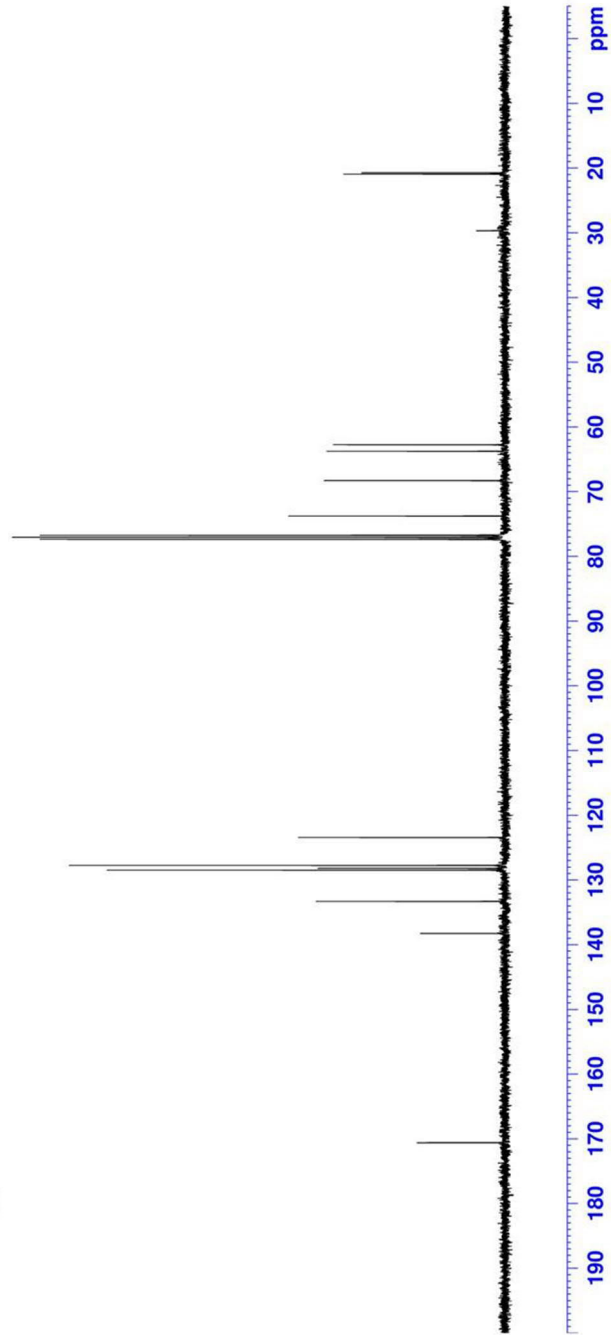

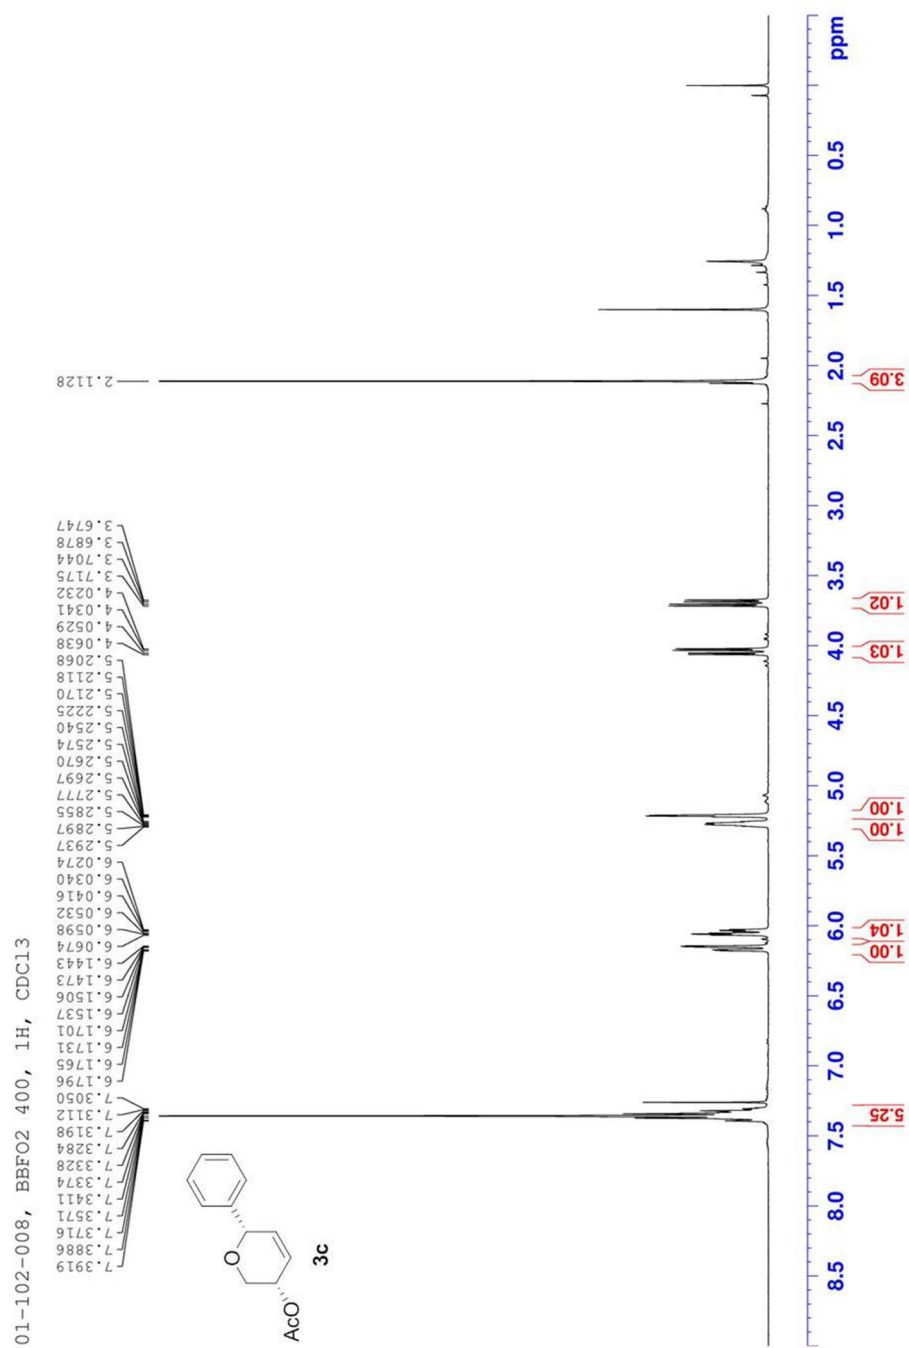

01-102-008, BBFO2 400, 13C, CDCl3

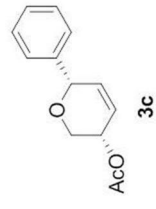

170.67  
139.11  
133.27  
128.57  
128.29  
127.76  
124.45

75.09

64.69  
64.68

21.14

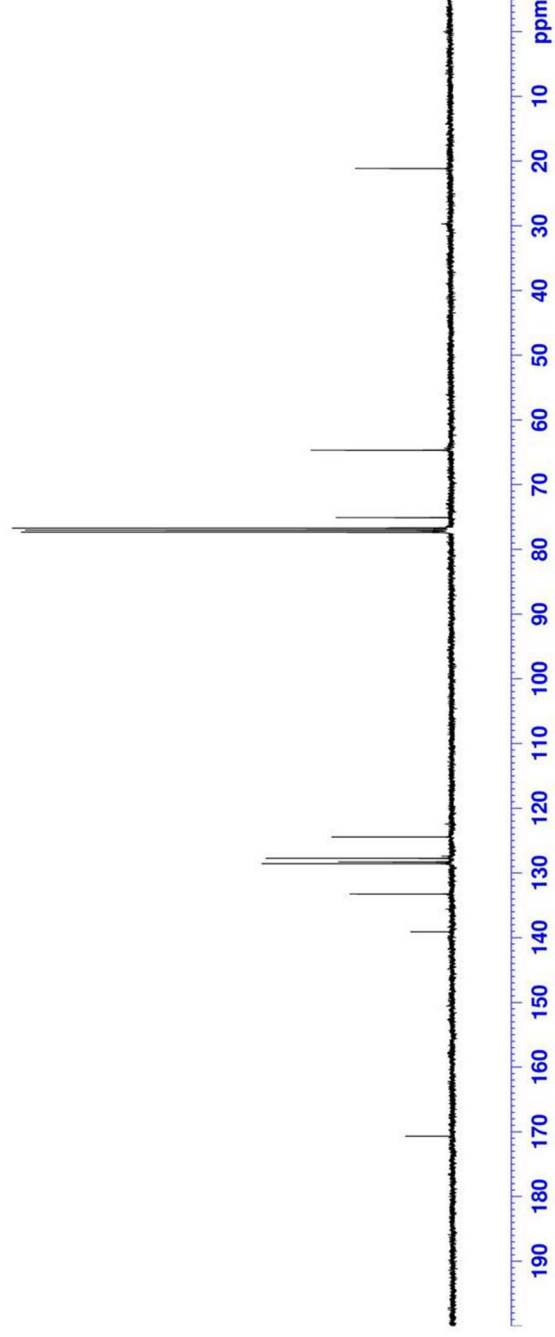

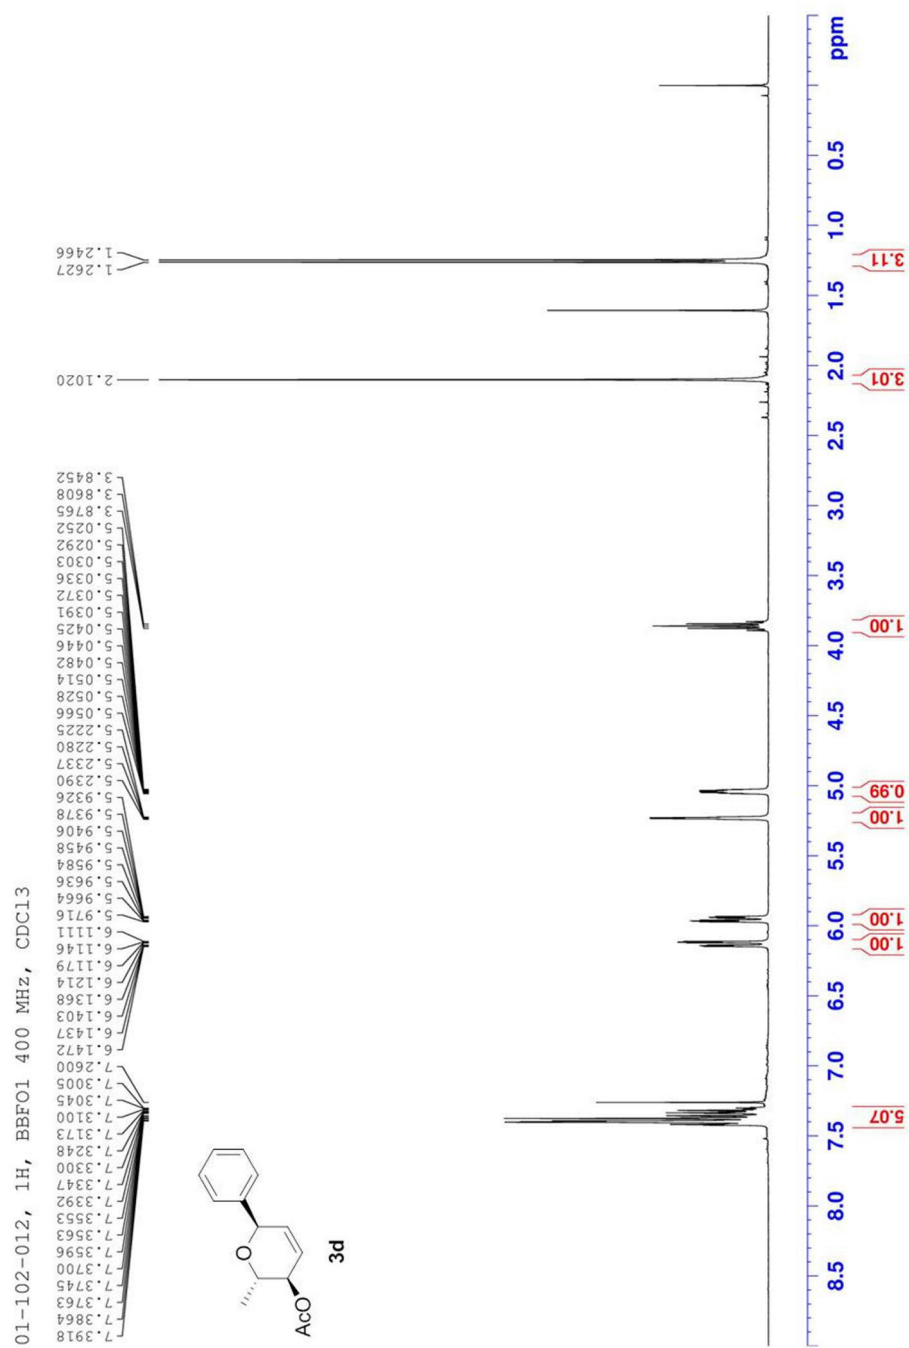

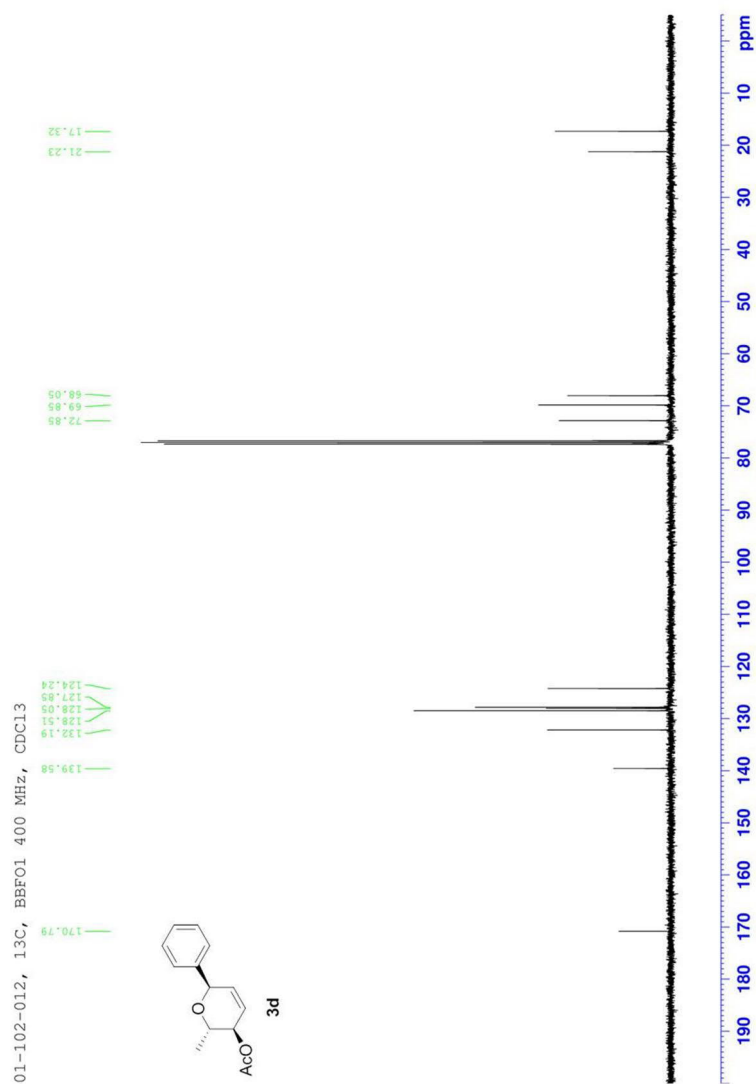

01-102-013, 1H, BBFO1 400 MHz, CDCl3

7.3410  
7.3333  
7.3267  
7.3232  
7.3201  
7.3147  
7.3077  
7.2998  
7.2984  
7.2925  
7.2882  
7.2850  
7.2733  
7.2689  
7.2537  
6.1643  
6.1600  
6.1563  
6.1382  
6.1339  
6.1301  
6.1186  
6.1156  
6.1122  
6.1086  
6.0926  
6.0896  
6.0861  
5.3169  
5.3132  
4.6410  
4.6122  
4.6092  
4.5783  
4.5105  
4.4817  
4.4762  
4.4458  
4.2123  
4.2083  
4.2033  
4.1973  
4.1932  
4.1893  
4.1843  
3.7239  
3.7193  
3.7129  
3.7084  
3.7026  
3.6946  
3.6840  
3.6731  
3.6396  
3.6352  
3.6288  
3.6248  
3.6167  
3.6053  
3.6003  
3.5957

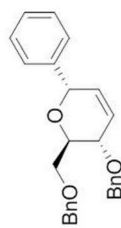

3e

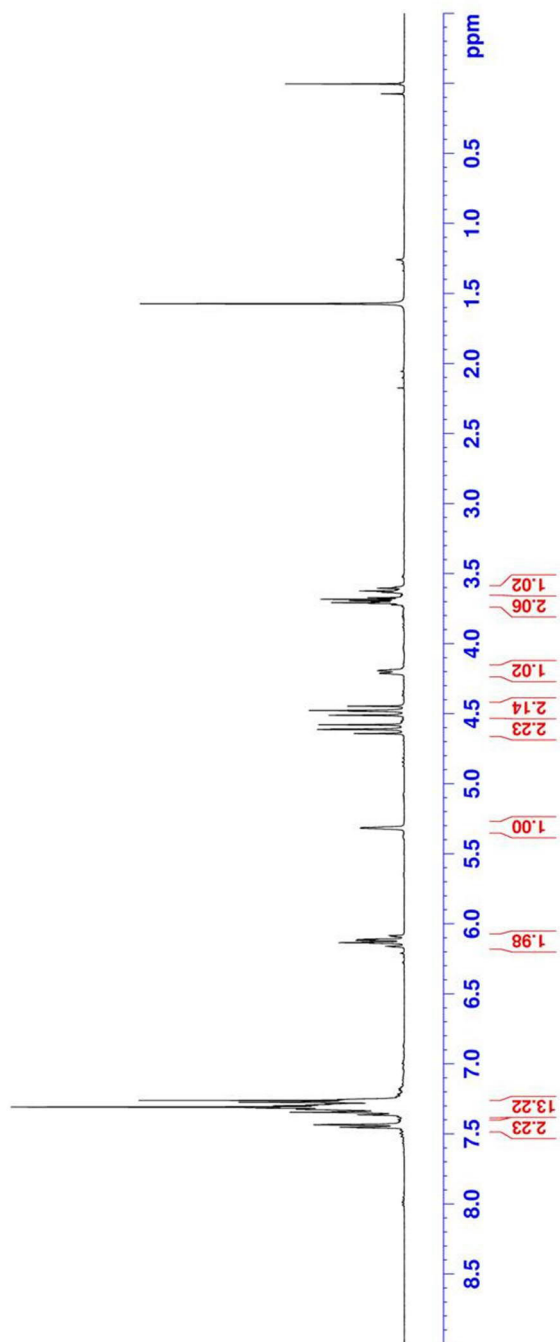

01-102-013, BBFO2 400, 13C, CDCl3

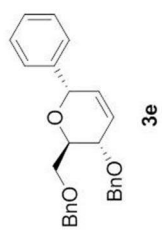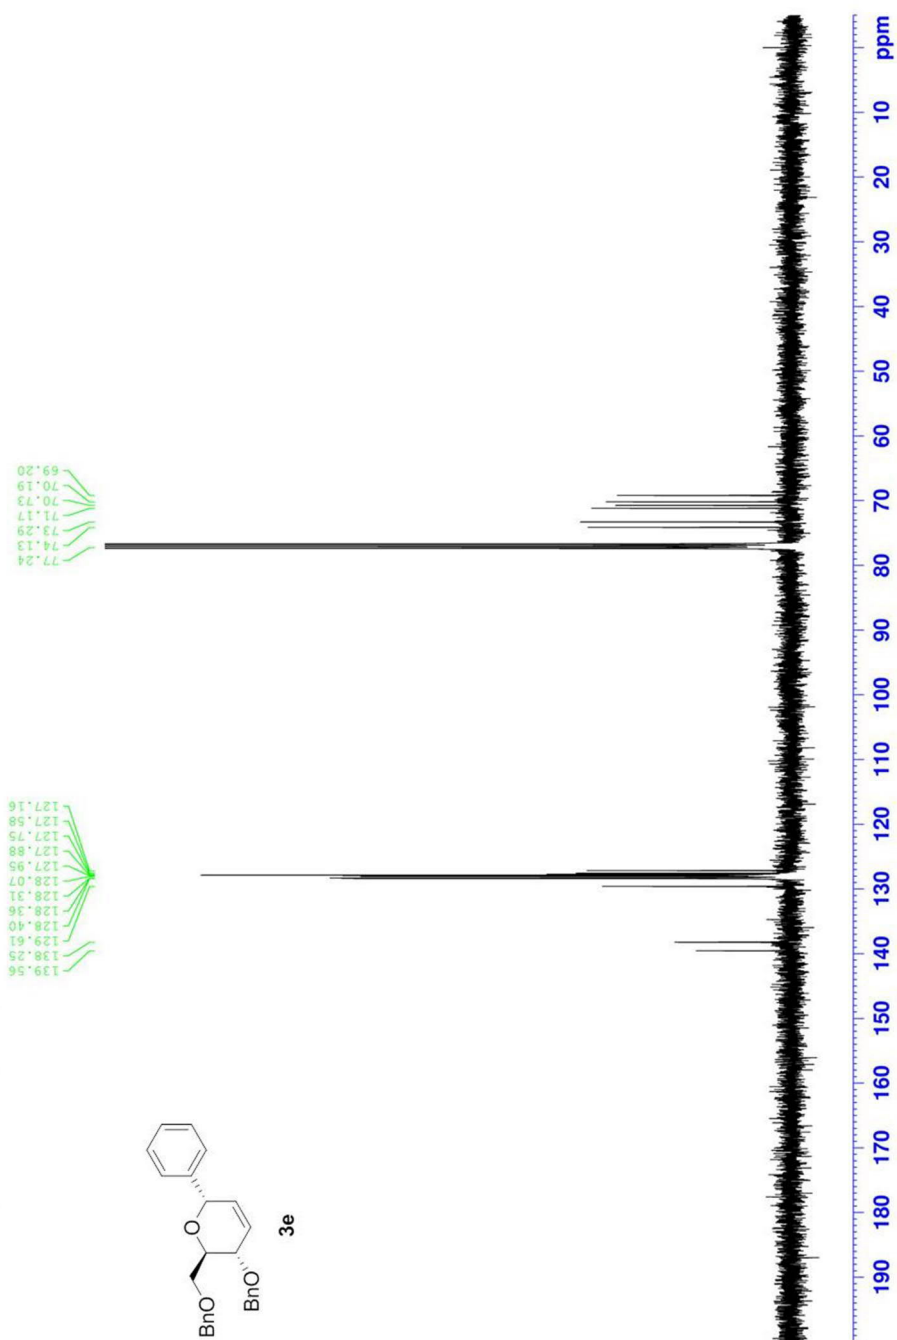

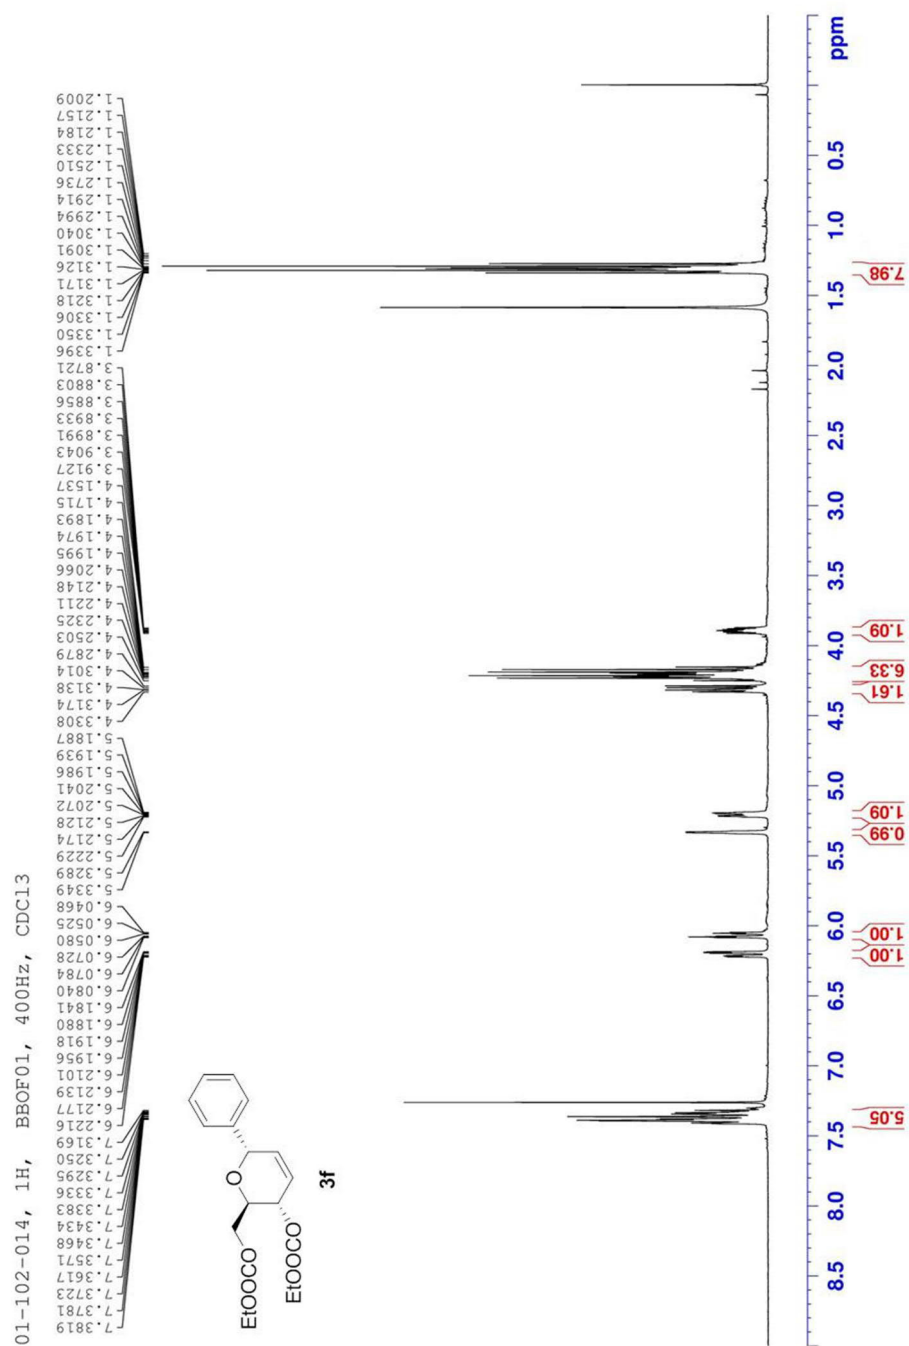

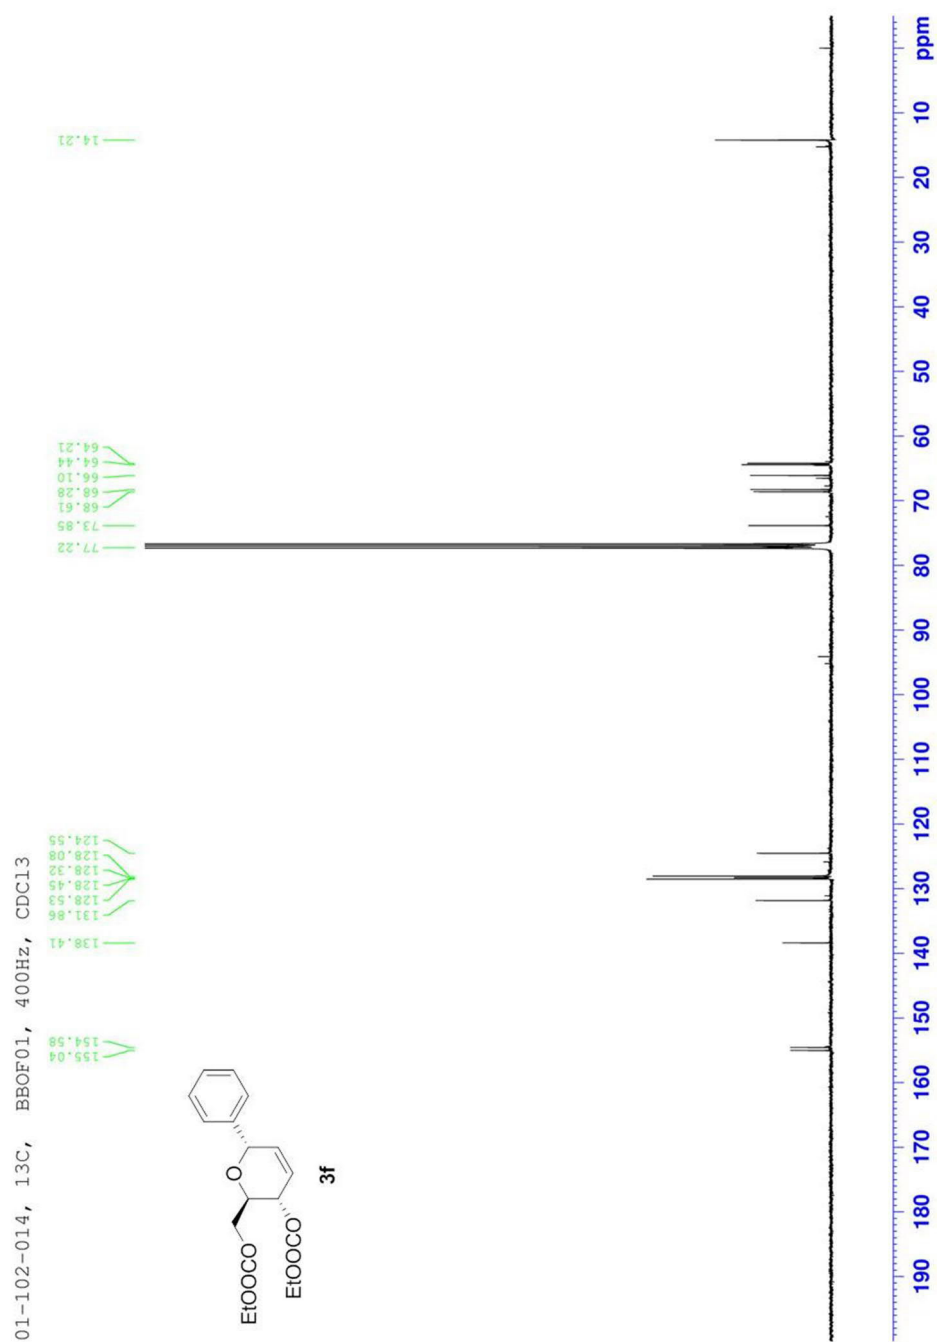

01-102-018, 1H, BBOF01, 400Hz, CDCl3

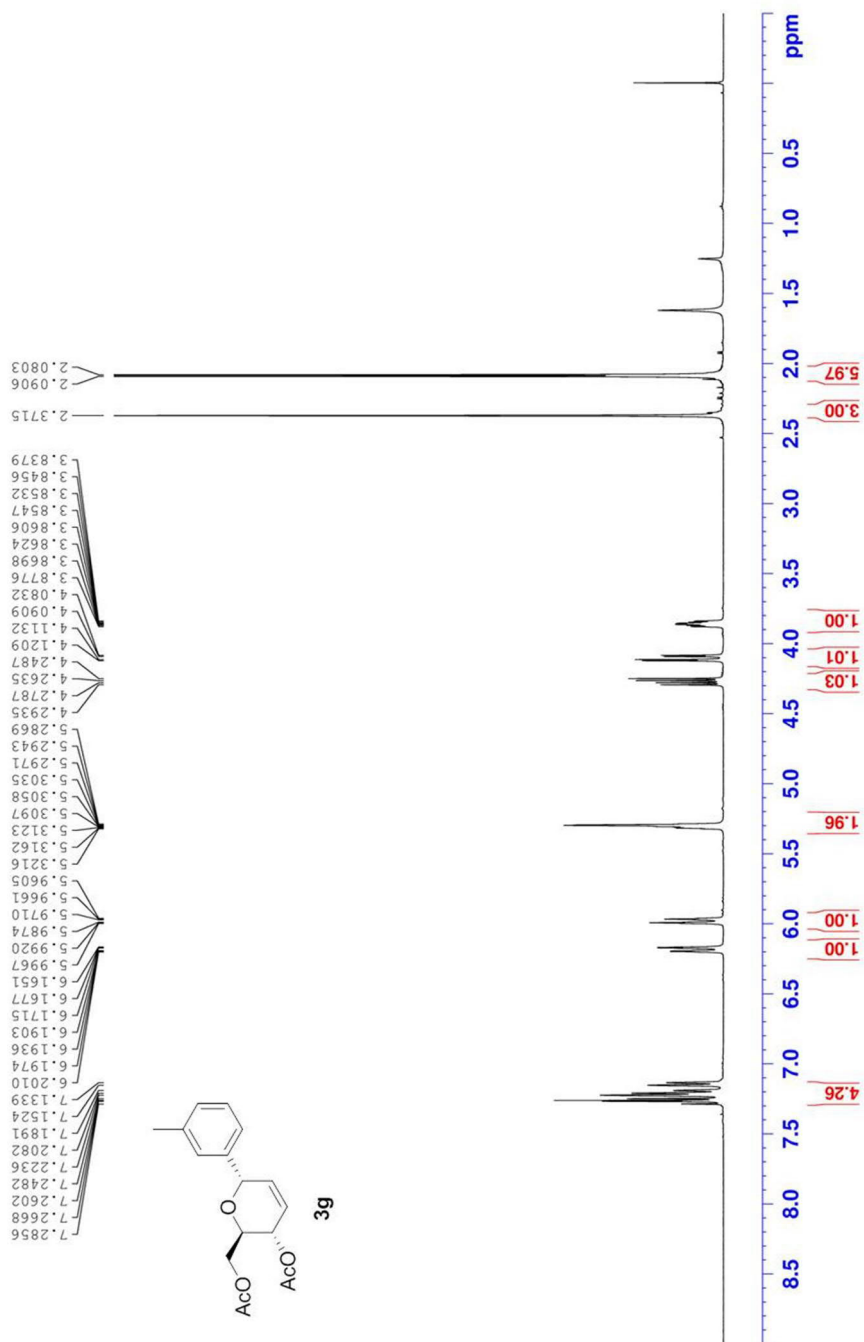

01-102-018, <sup>13</sup>C, BBOF01, 400Hz, CDCl<sub>3</sub>

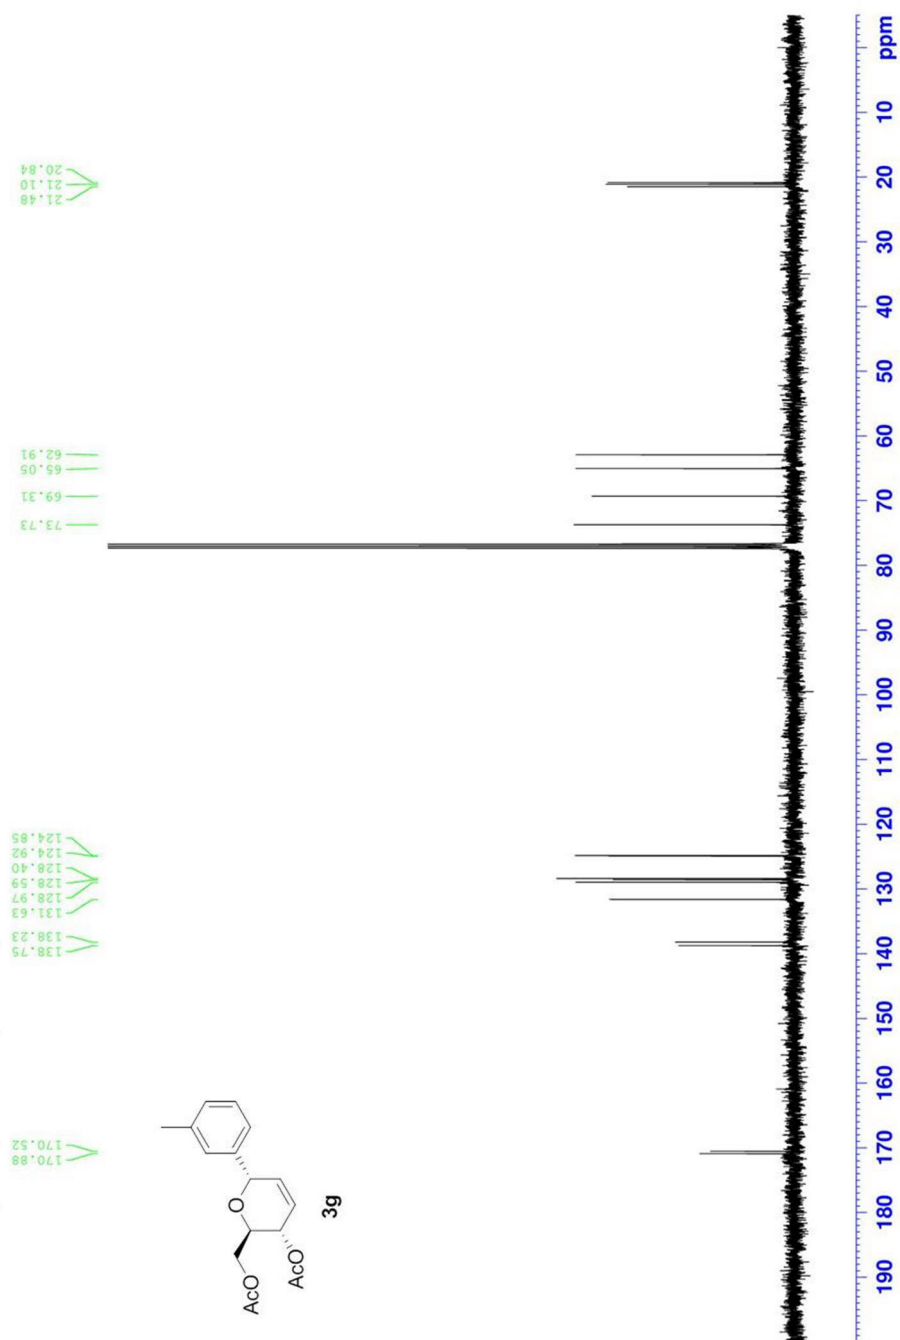

01-102-022, 1H, BEF01 CDCl3

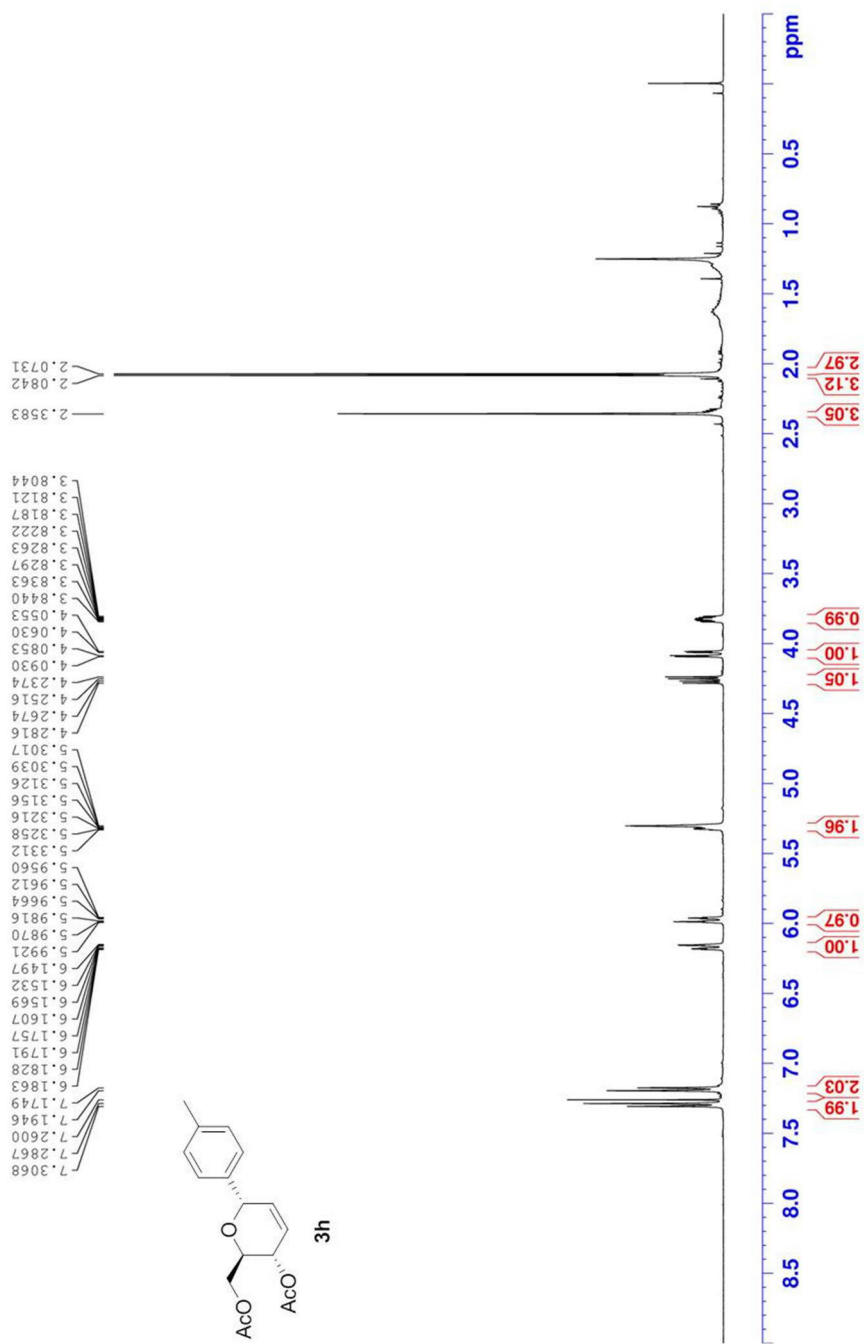

01-102-022, <sup>13</sup>C, BBO1 CDCl<sub>3</sub>

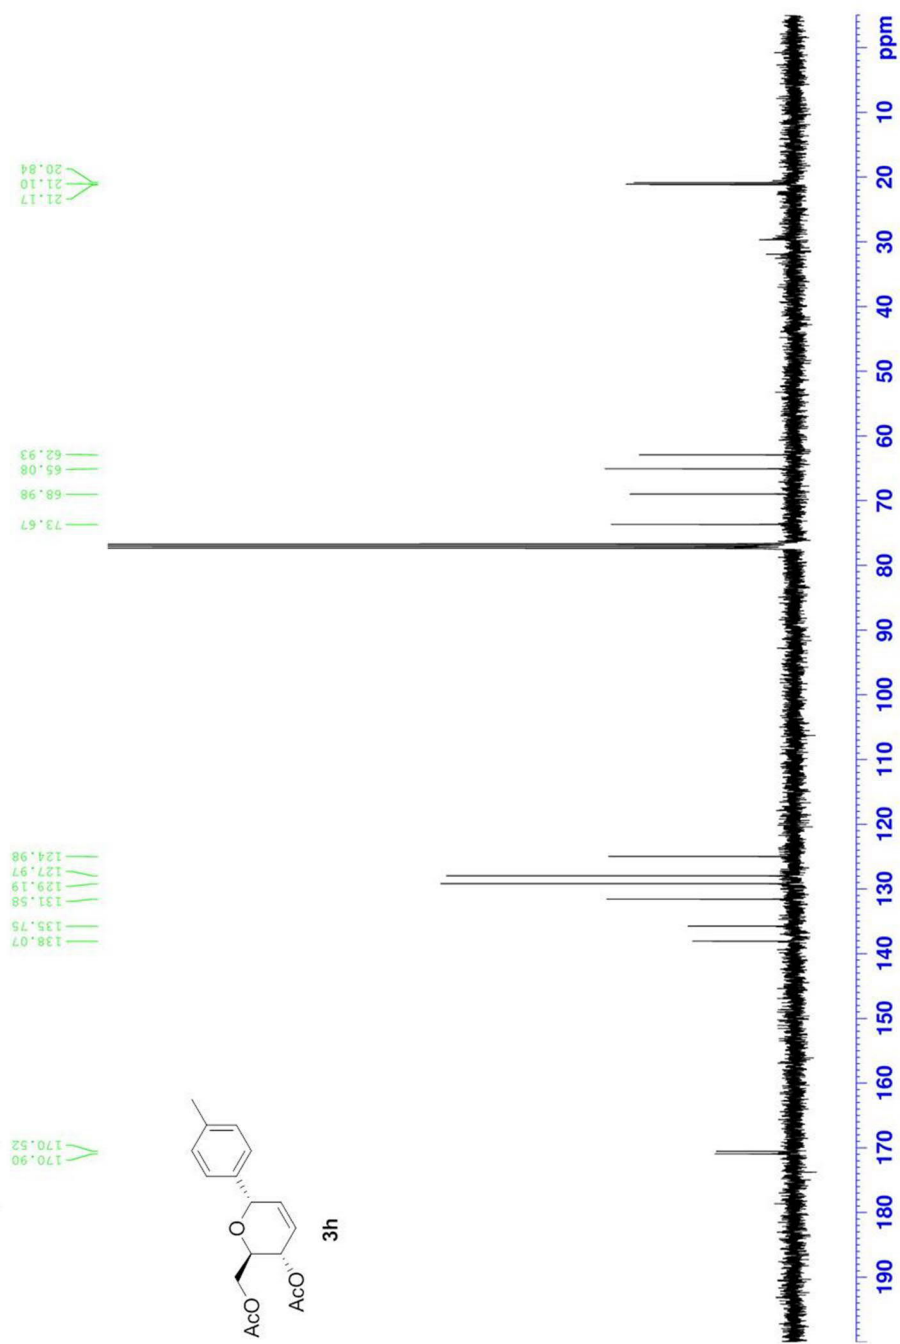

01-102-025, 1H, BBF01 CDCl3

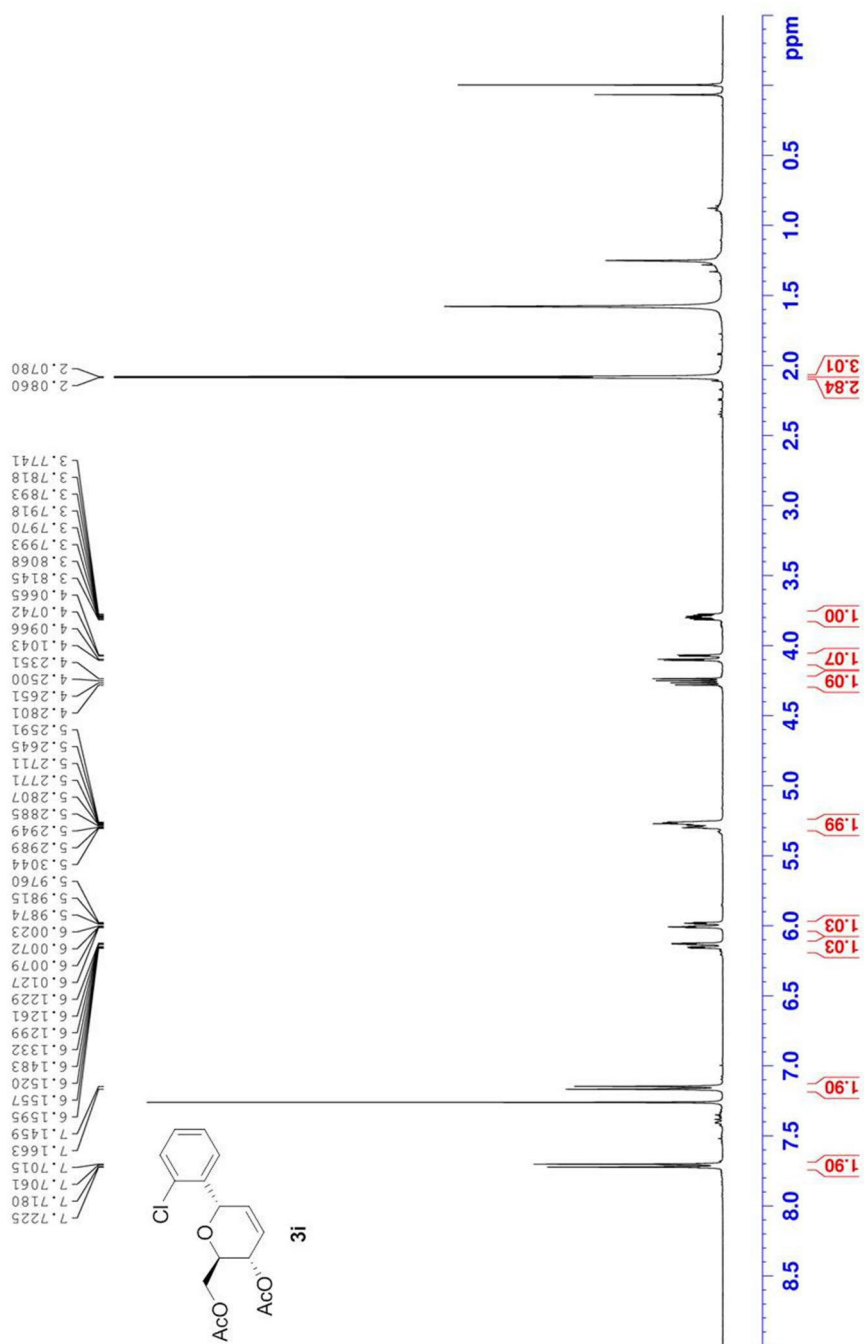

01-102-020, <sup>13</sup>C, BBOF01, 400Hz, CDCl<sub>3</sub>

170.86  
170.50  
135.91  
134.24  
131.37  
130.03  
129.65  
129.25  
126.66  
124.72

77.23  
70.23  
64.78  
62.54  
21.11  
20.83

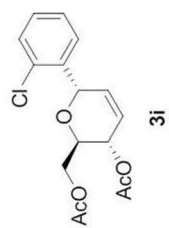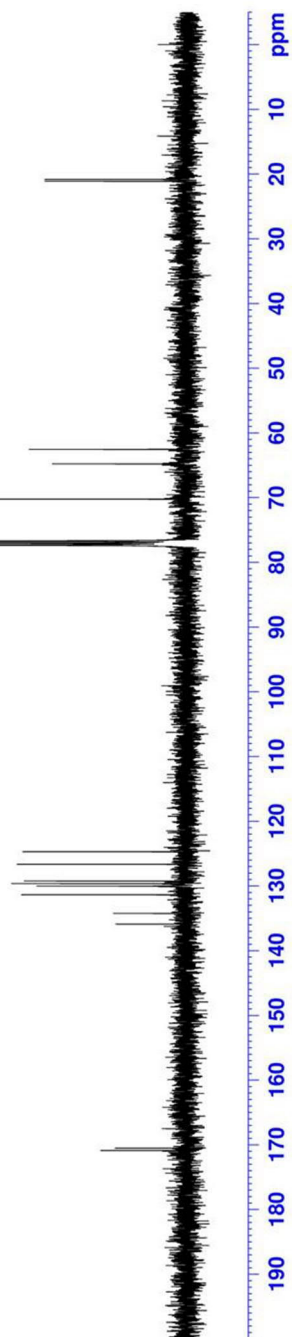

01-102-028, AV 400 MHz, <sup>1</sup>H NMR, CDCl<sub>3</sub>

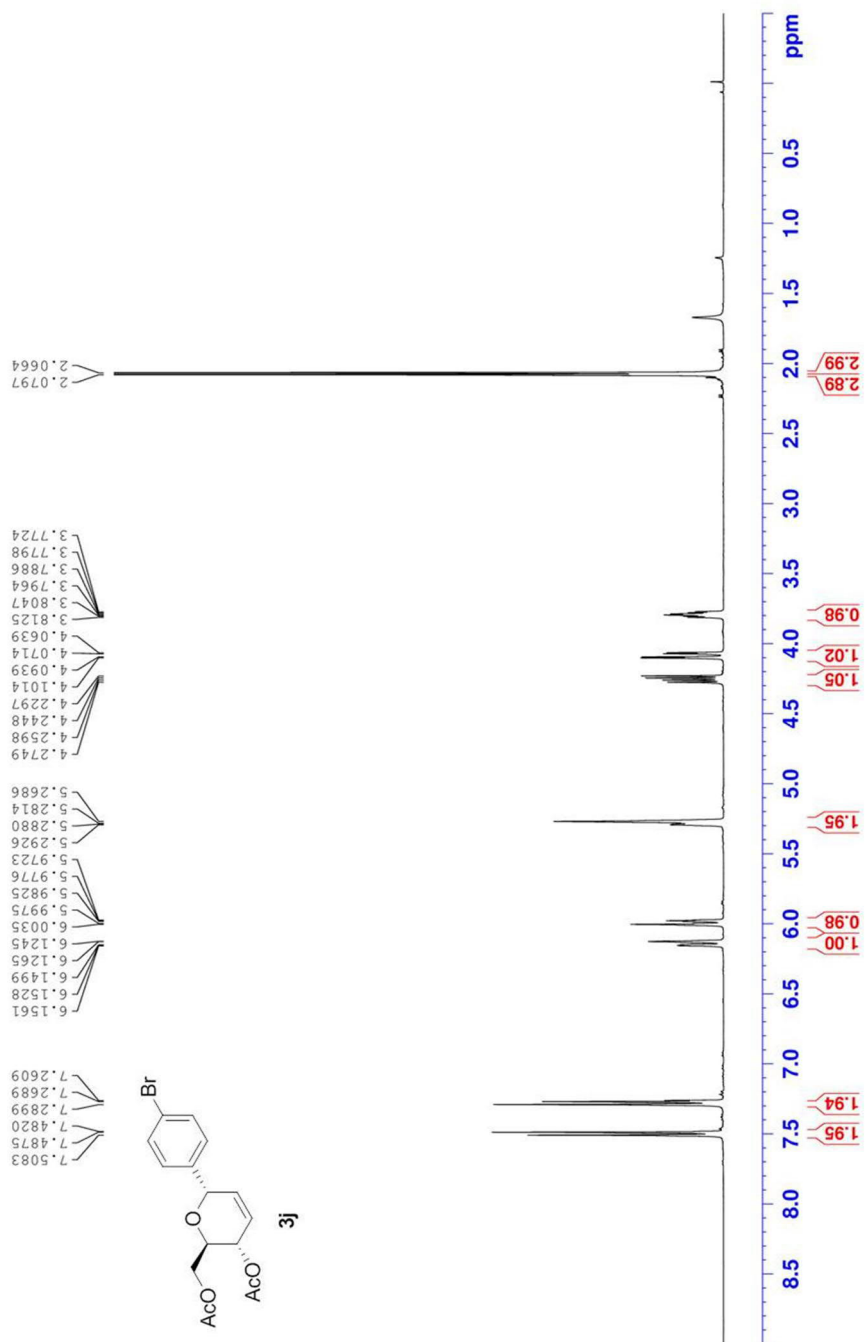

01-102-028, AV 400 MHz, <sup>13</sup>C NMR, CDCl<sub>3</sub>

170.78  
170.42  
137.94  
131.68  
130.92  
129.59  
125.46  
122.35

73.00  
69.43  
64.88  
62.79

21.05  
20.81

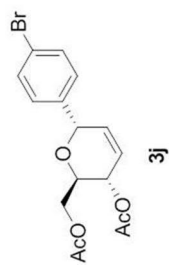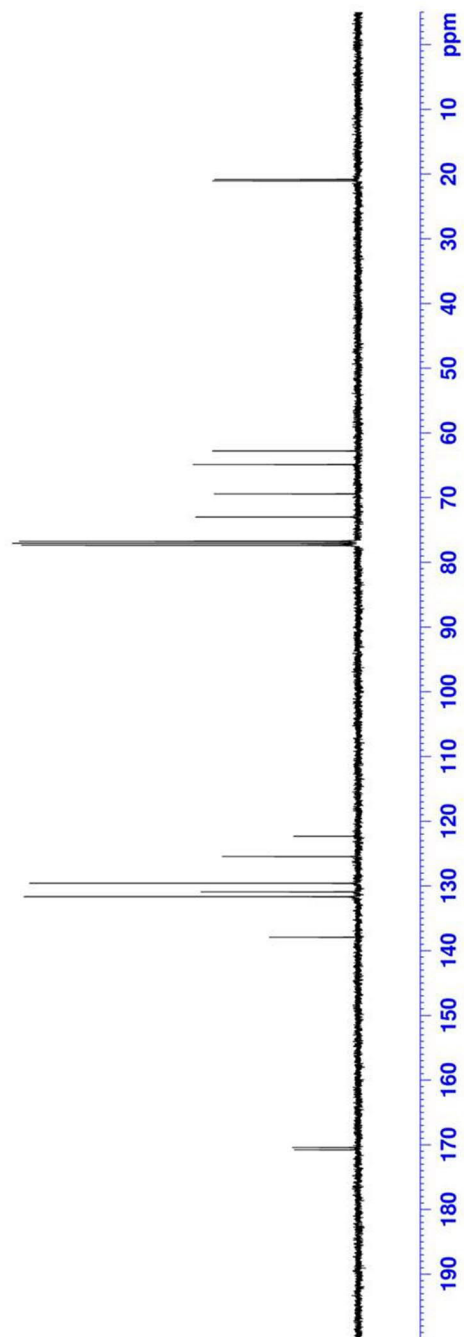

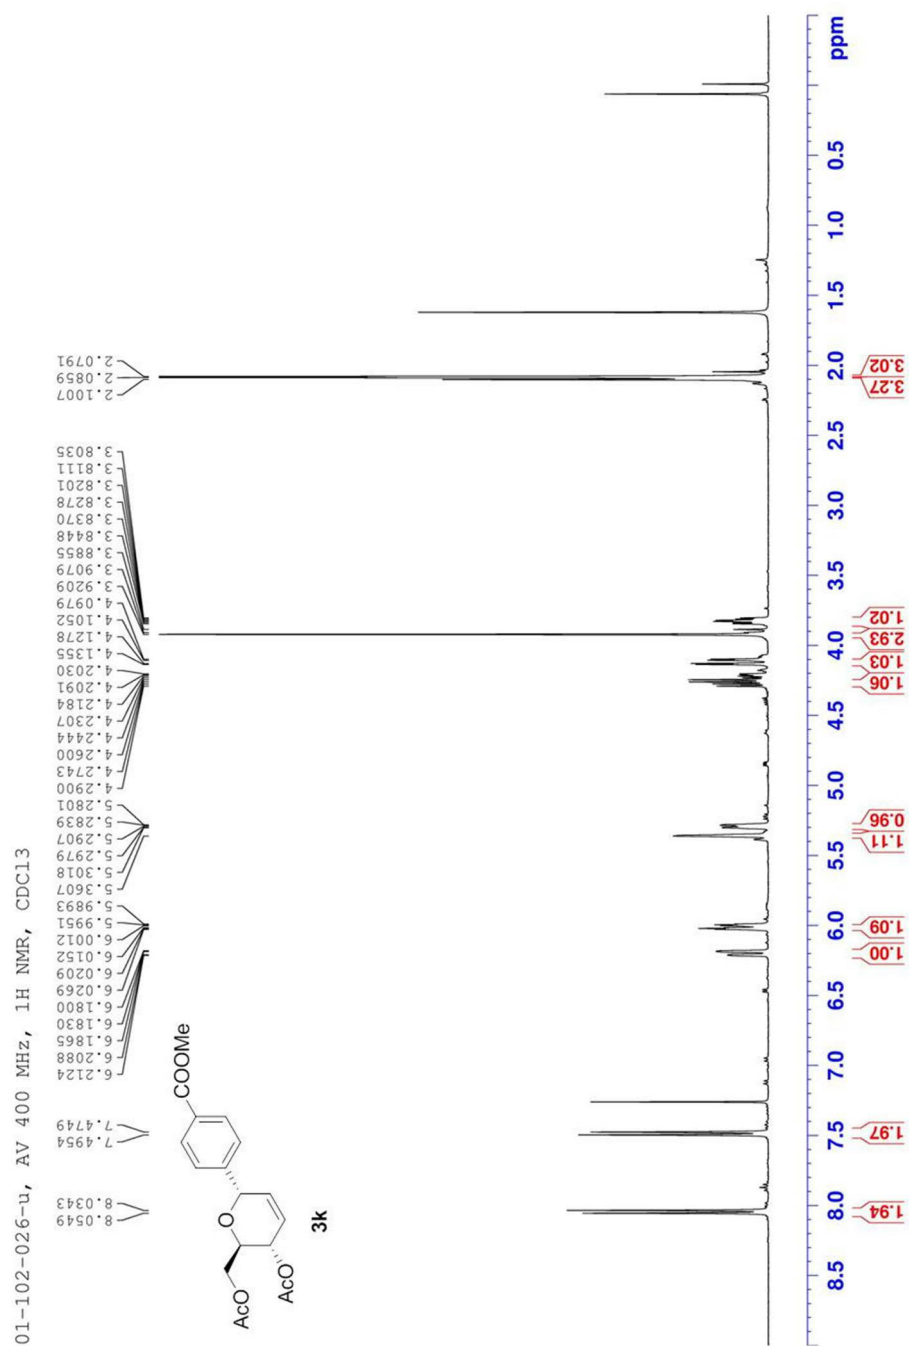

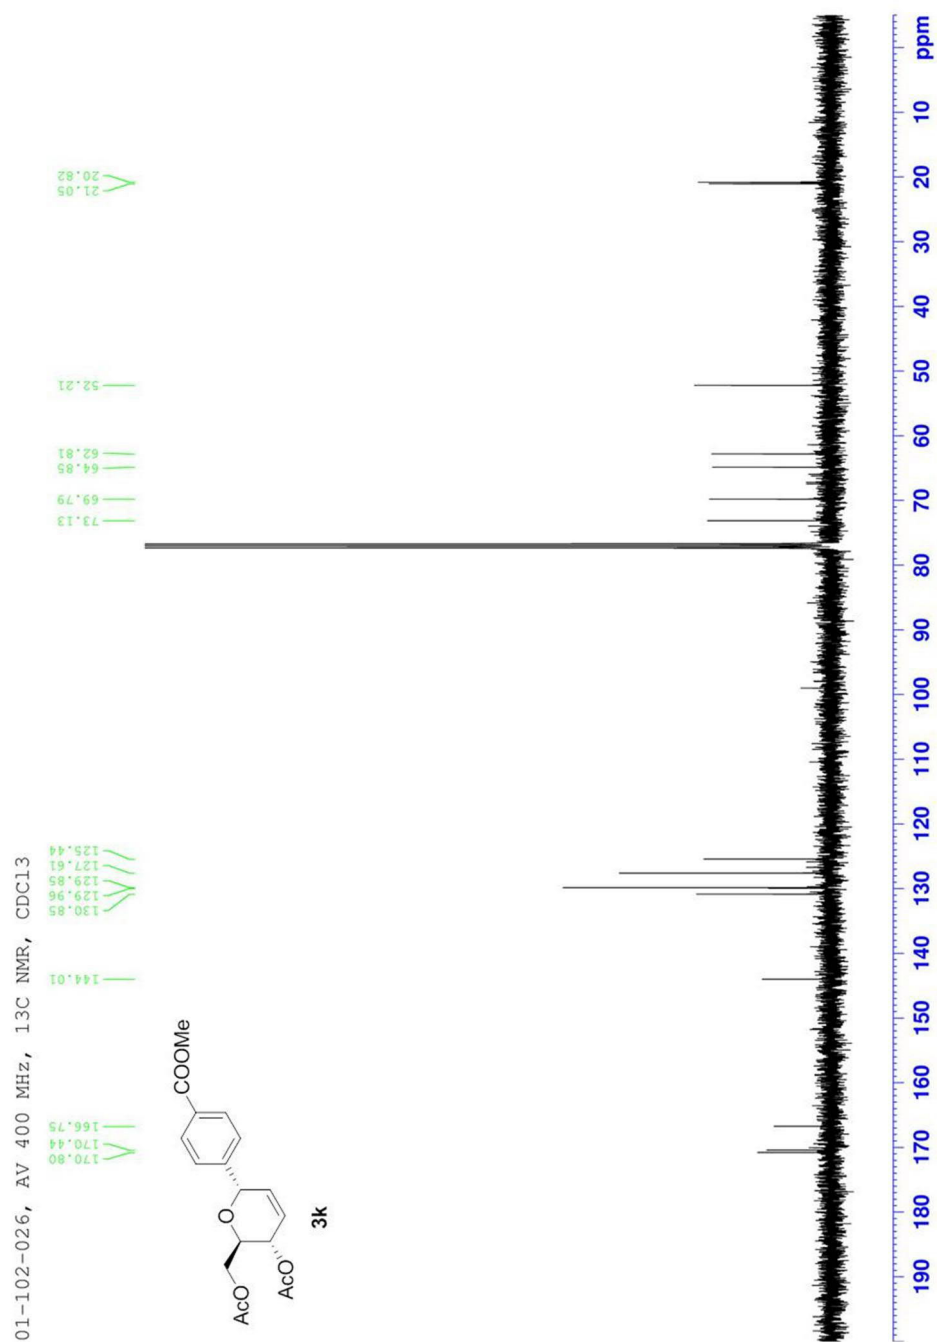

01-102-025, 1H, BBF01 CDCl3

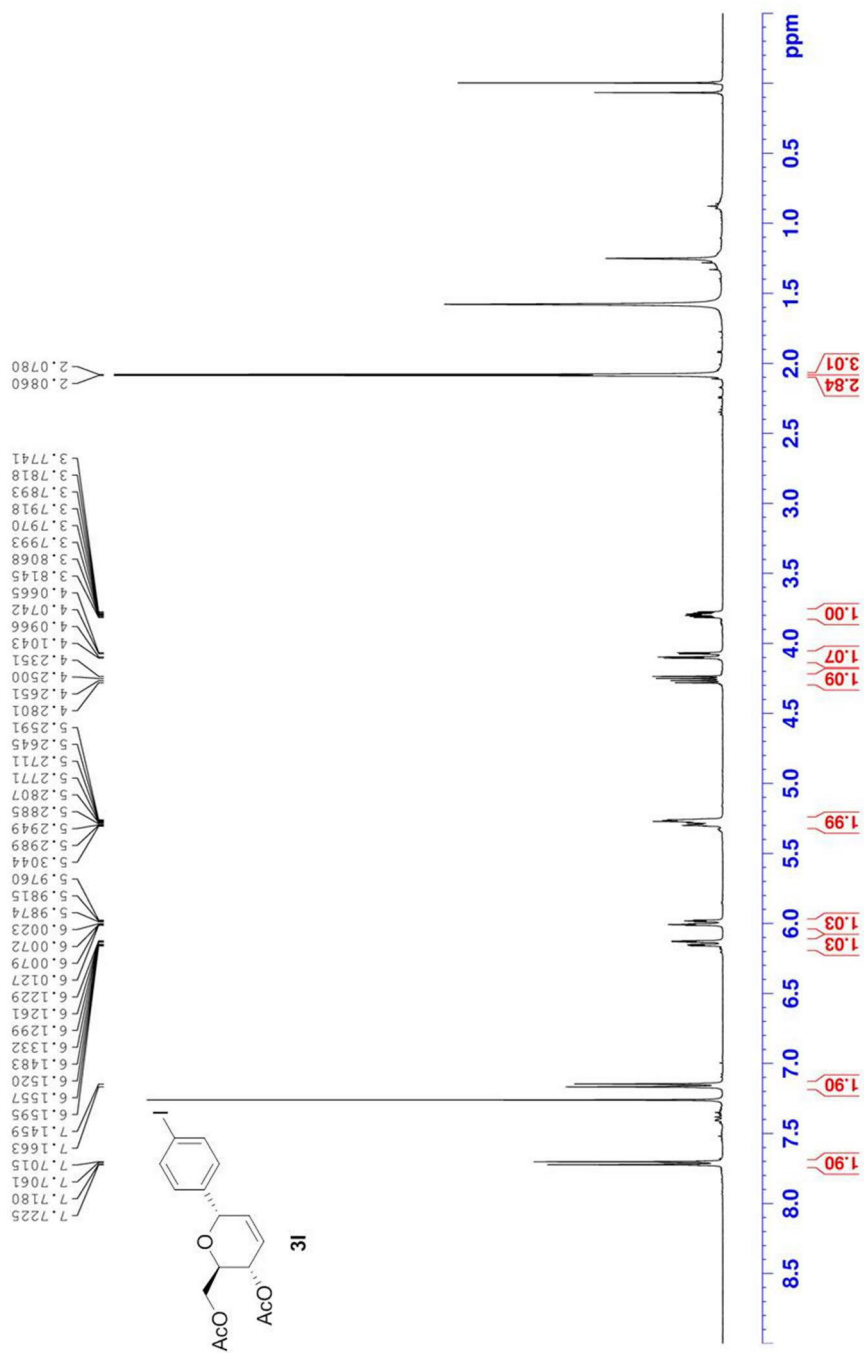

01-102-025; 400 MHz, <sup>1</sup>H NMR, CDCl<sub>3</sub>

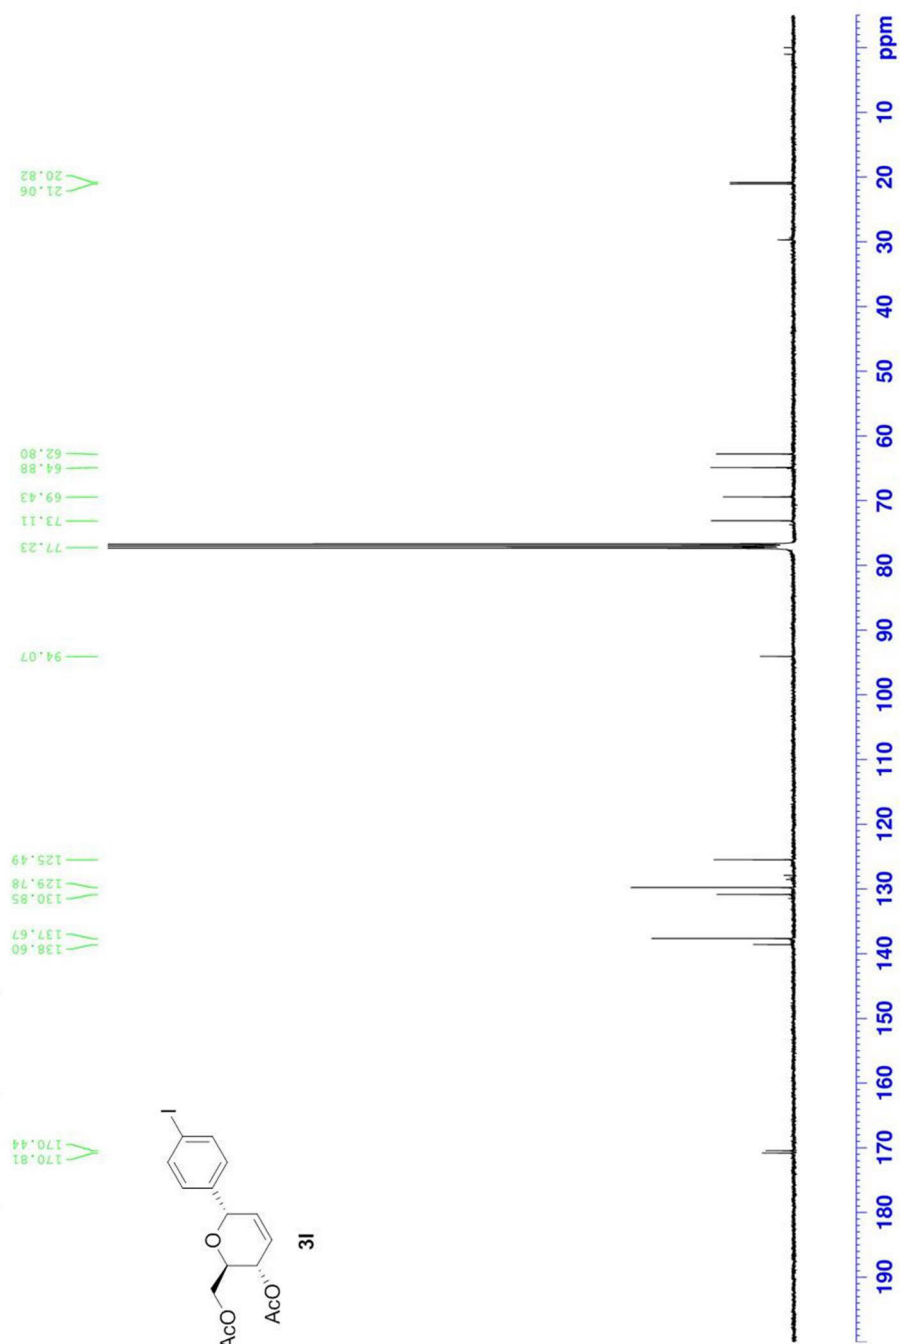

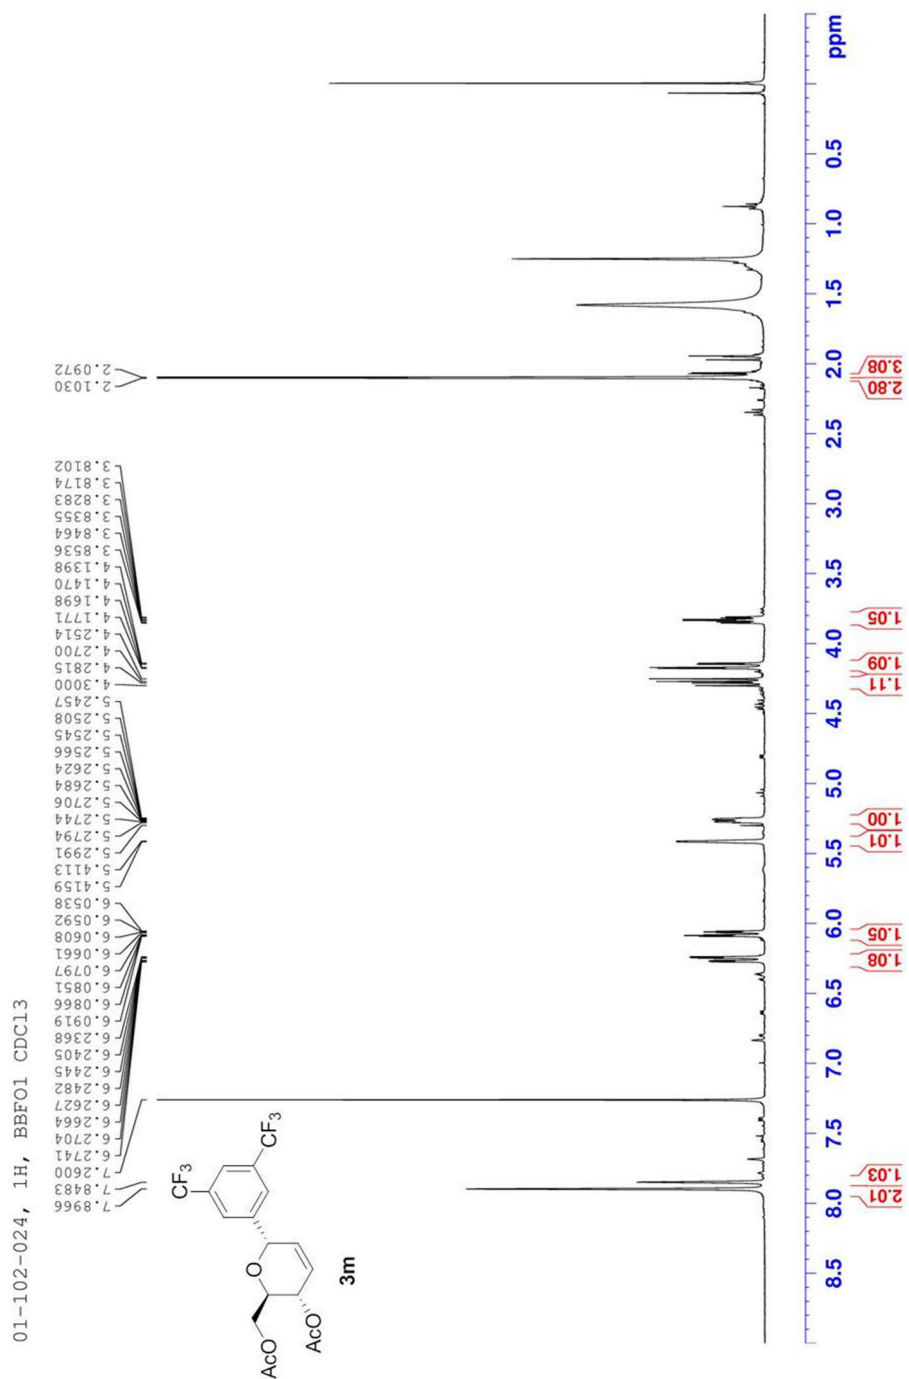

01-102-024, <sup>13</sup>C, BBF01 CDCl<sub>3</sub>

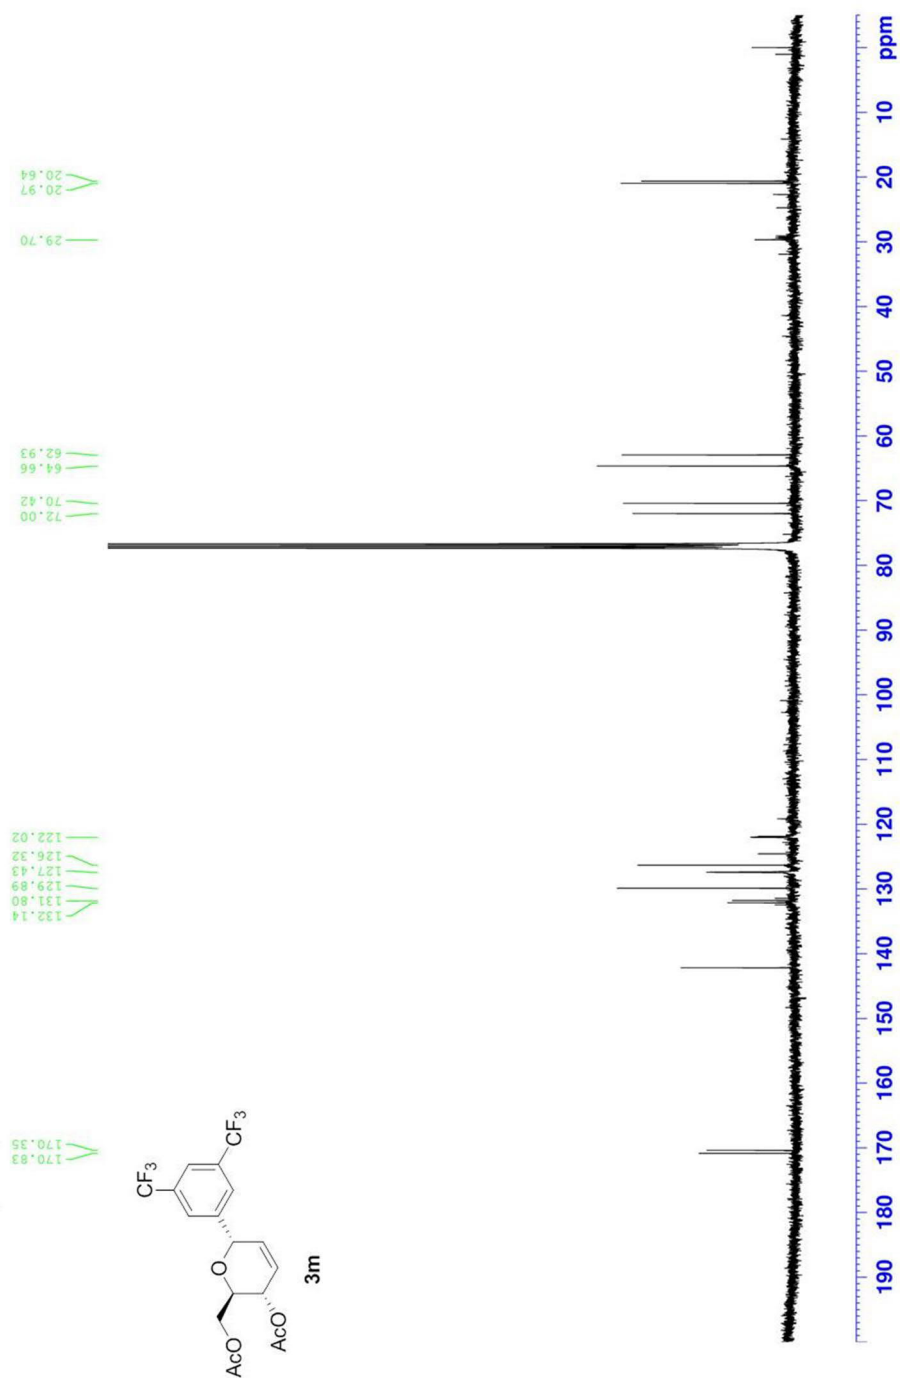

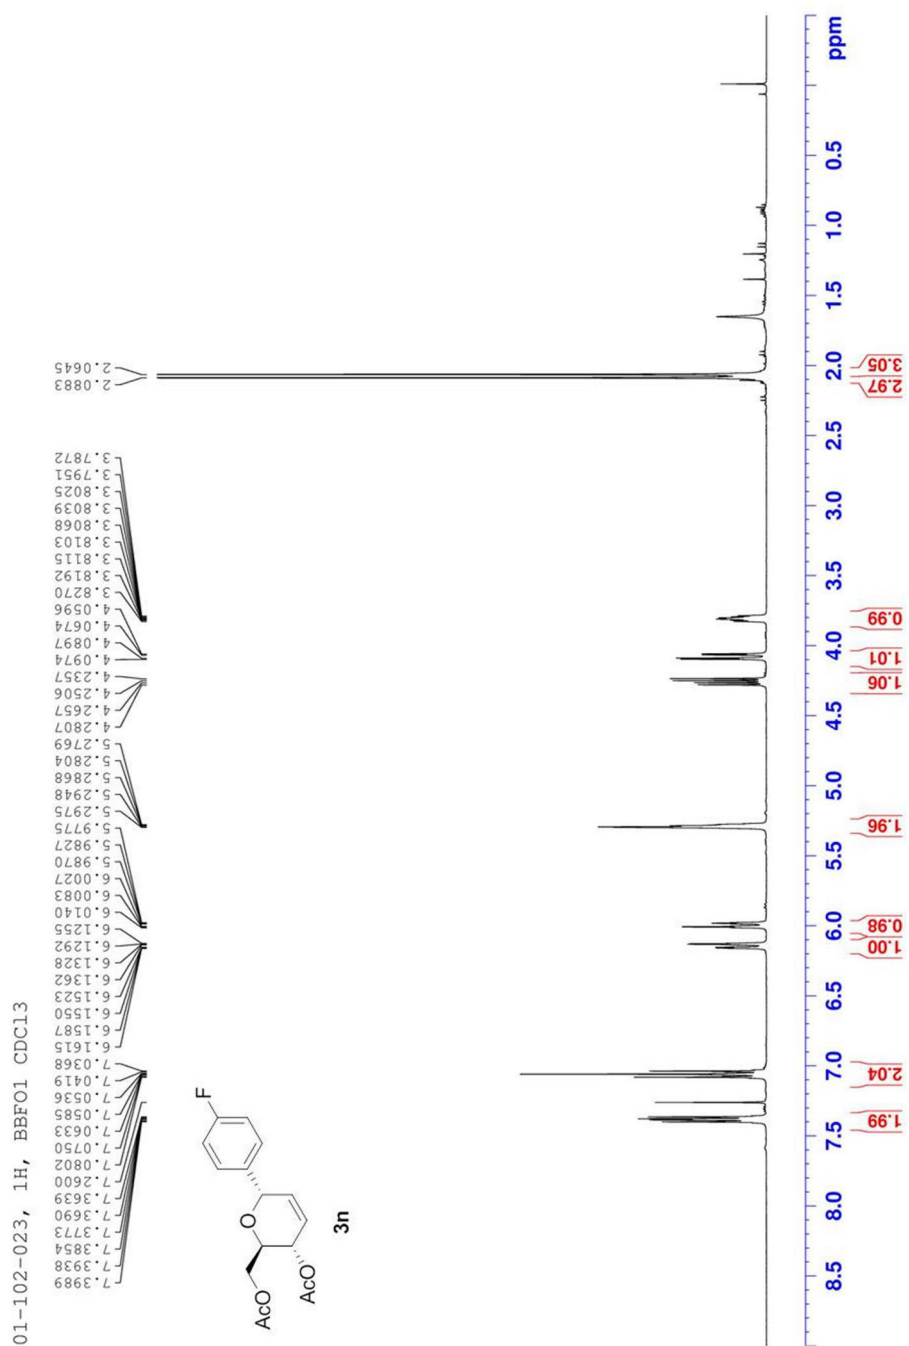

01-102-023, <sup>13</sup>C, BBF01 CDCl<sub>3</sub>

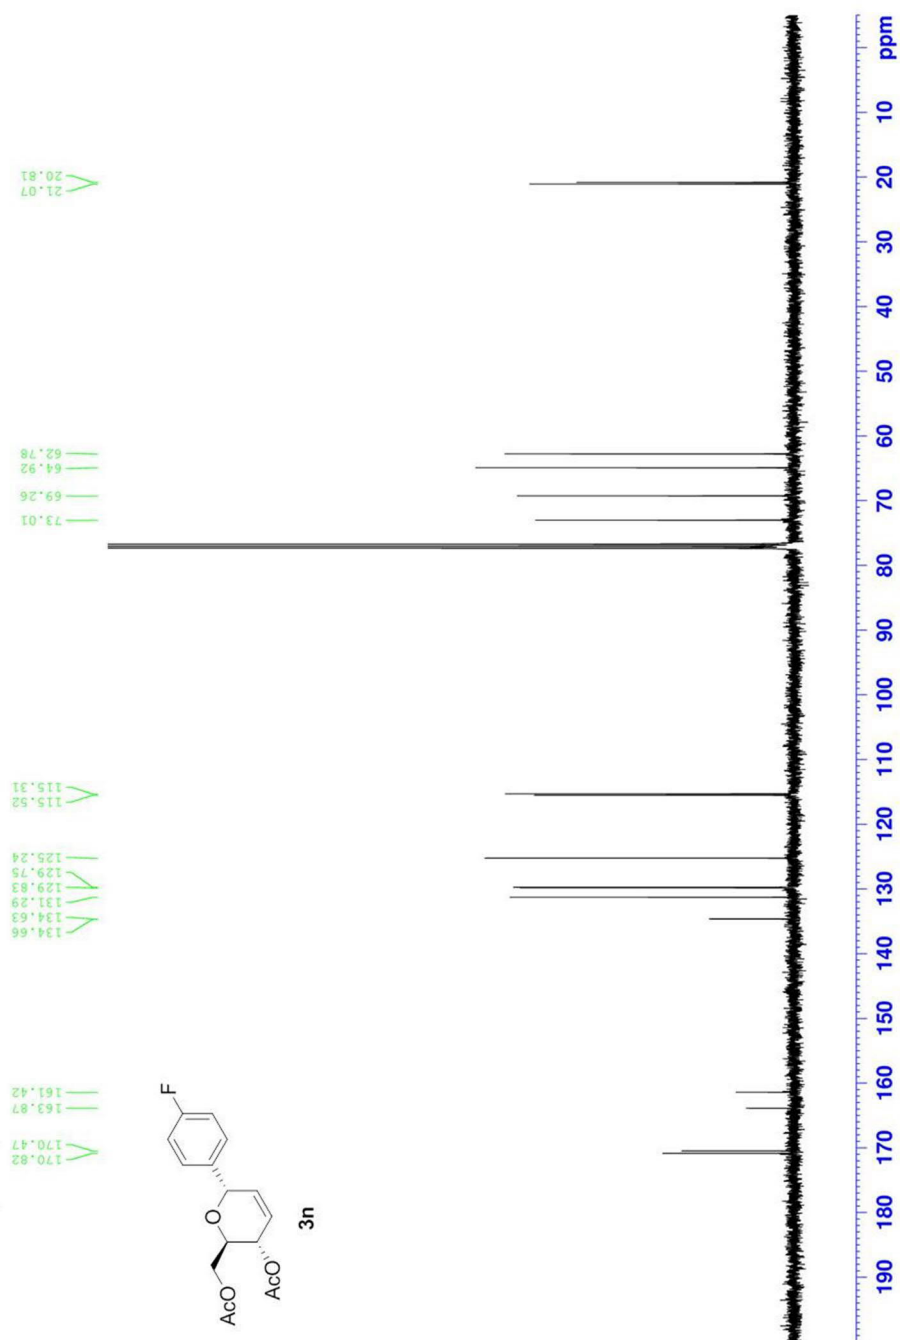

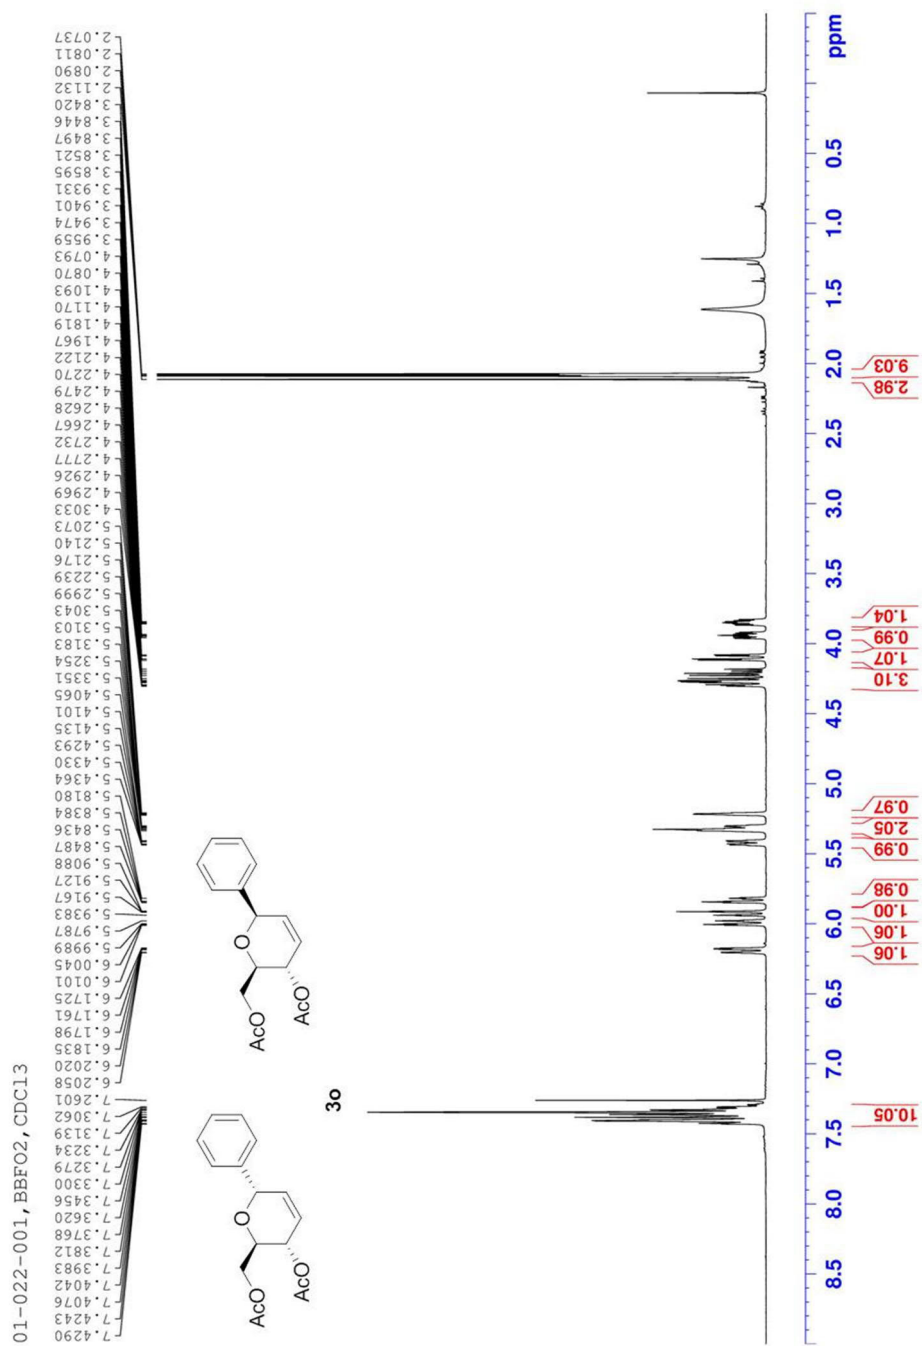

01-022-001, BBFO2, CDCl3

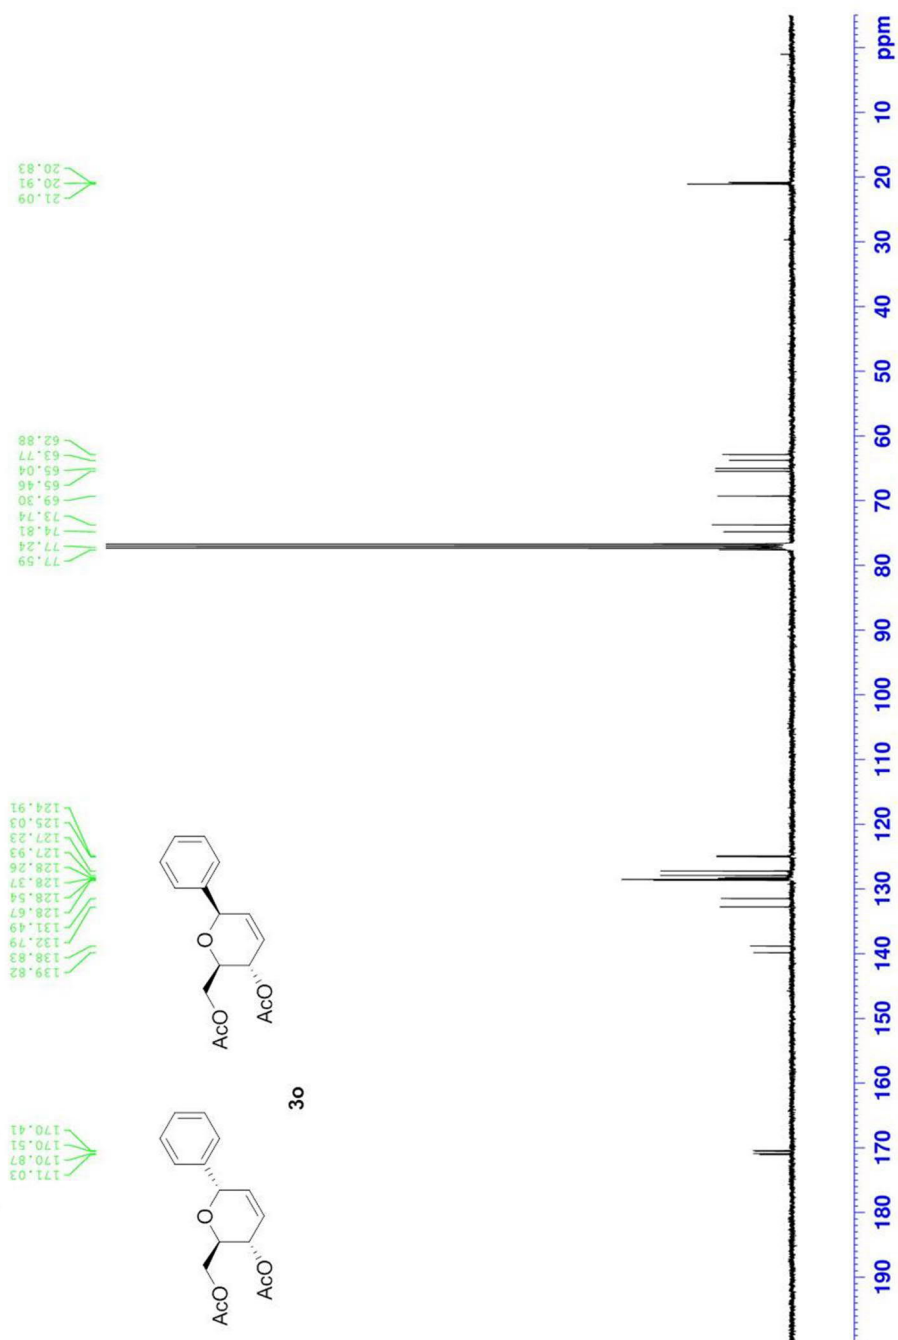

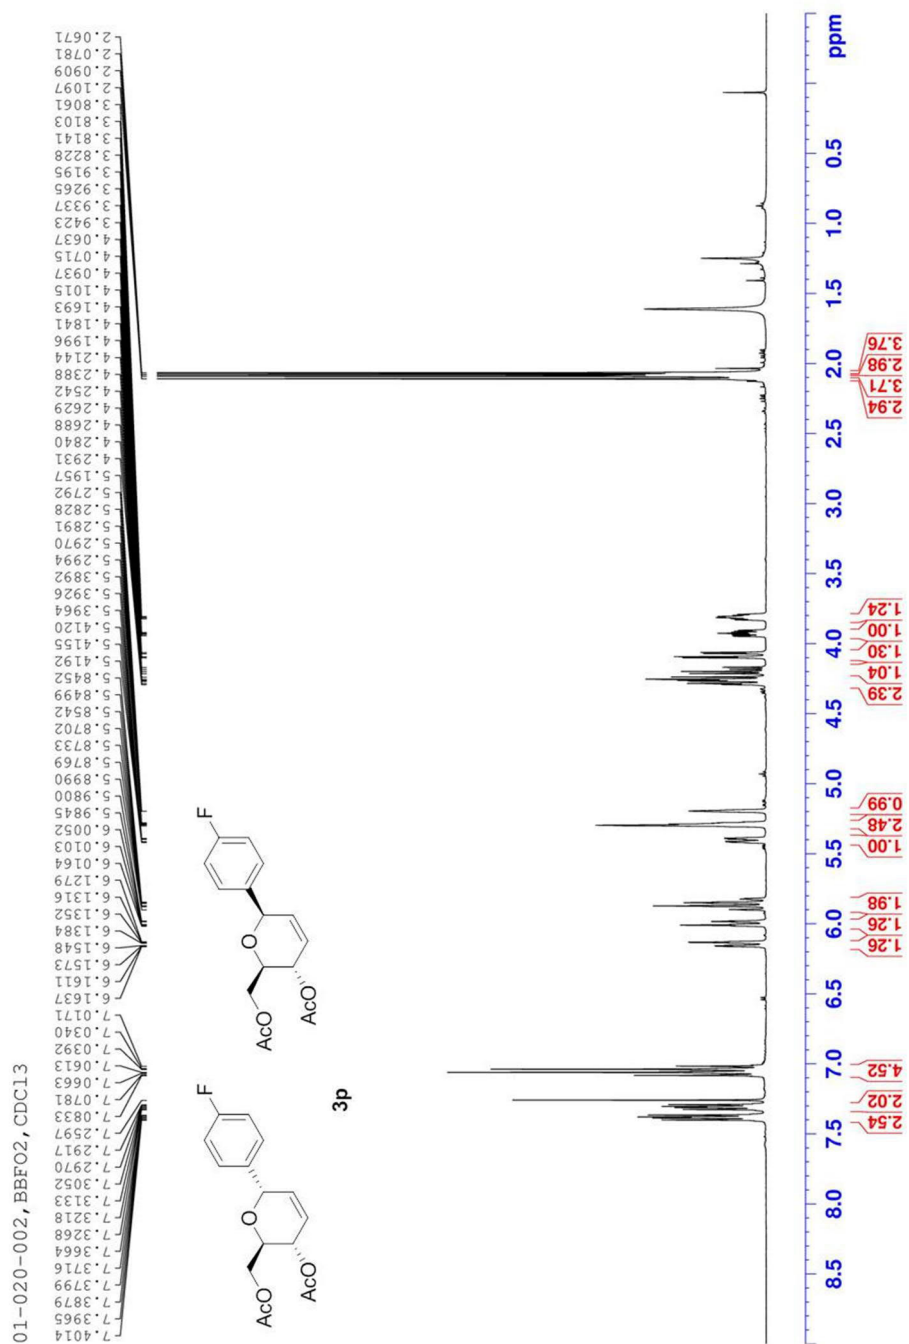

01-020-002, BBFO2, CDC13

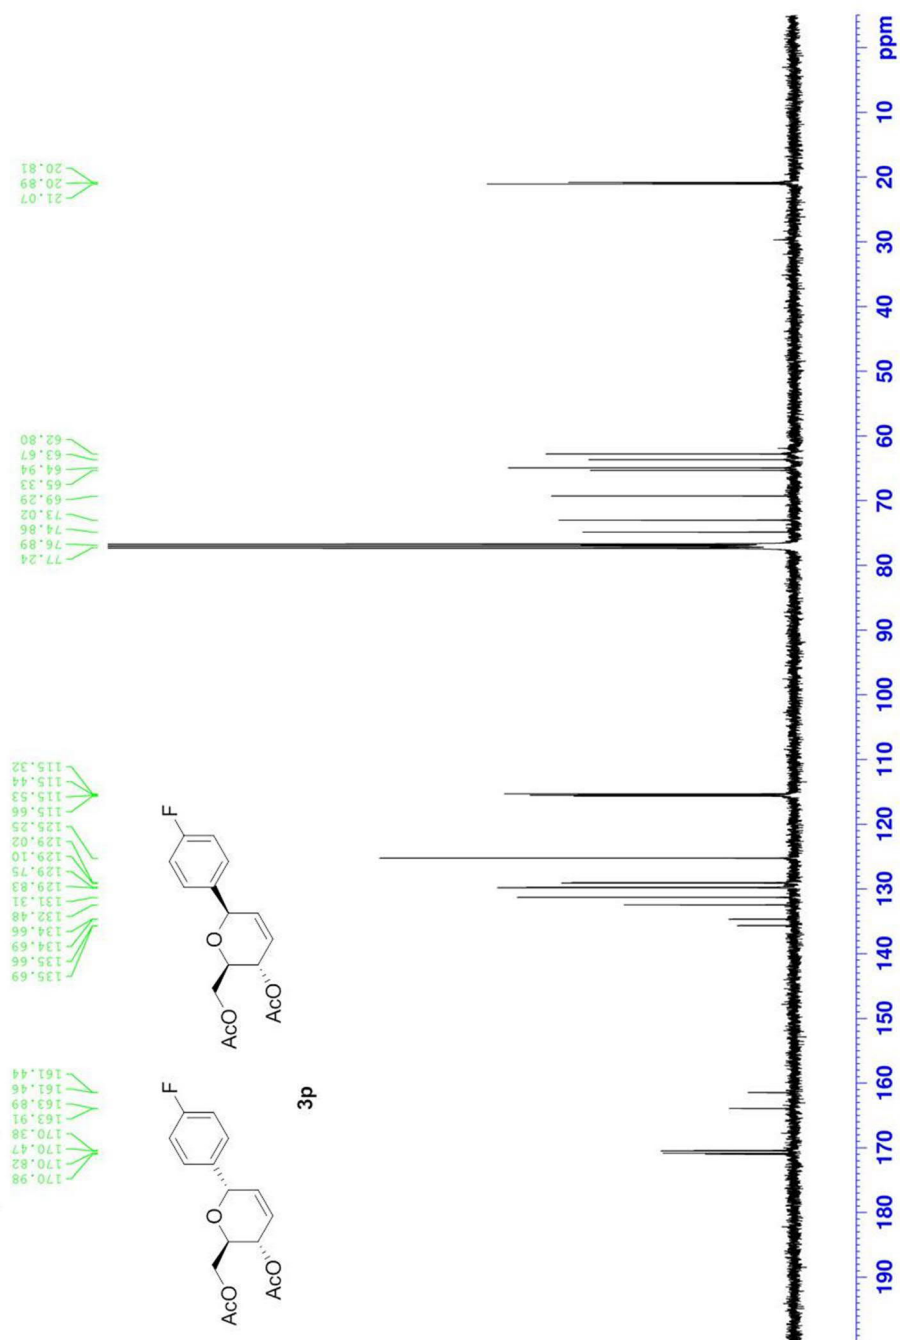

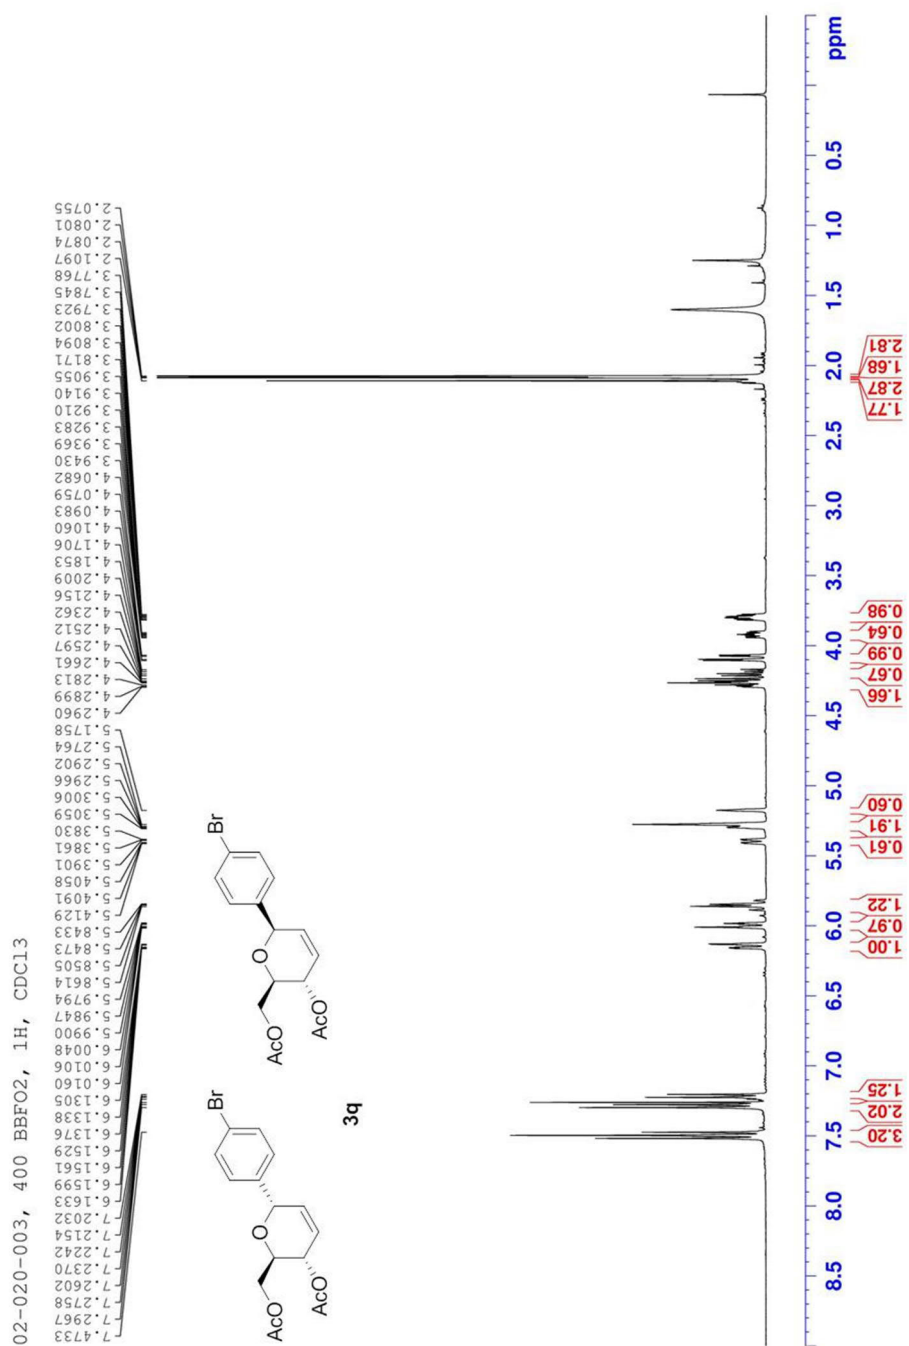

02-020-003, 400 BBFO2, 13C, CDCl3

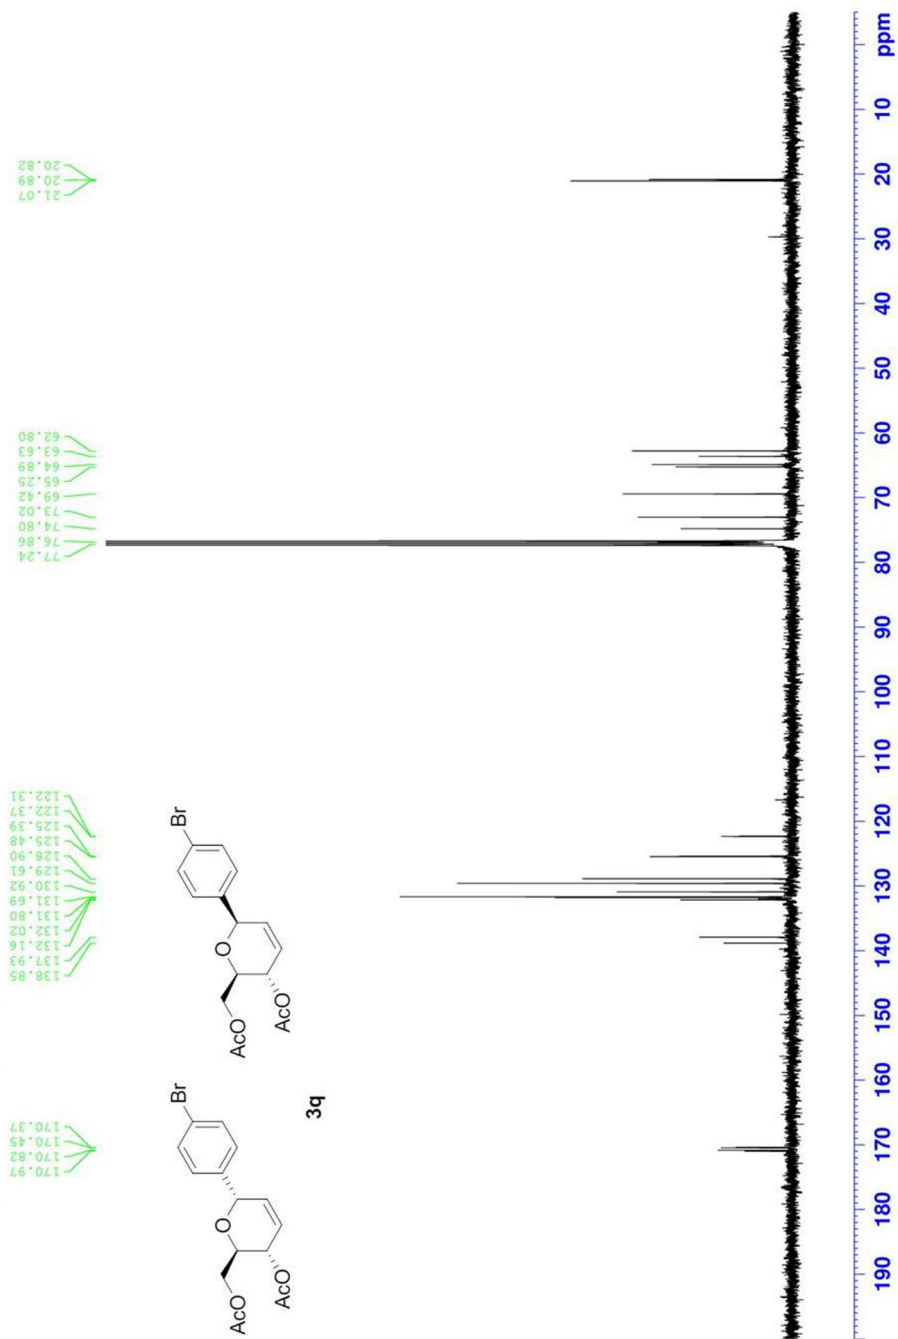

02-020-004, 400 BBFO2, 1H, CDCl3

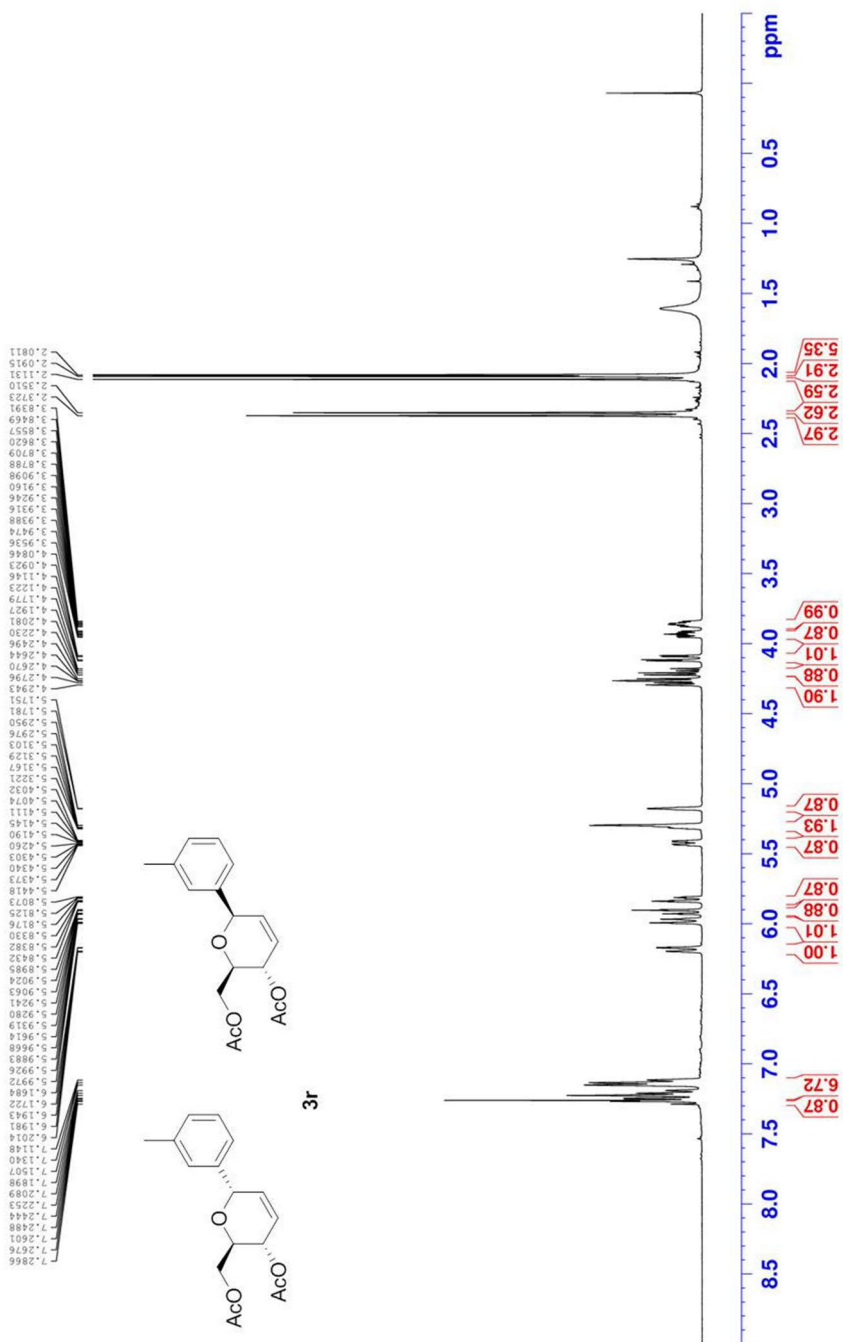

02-020-004, 400 BBFO2, 13C, CDCl3

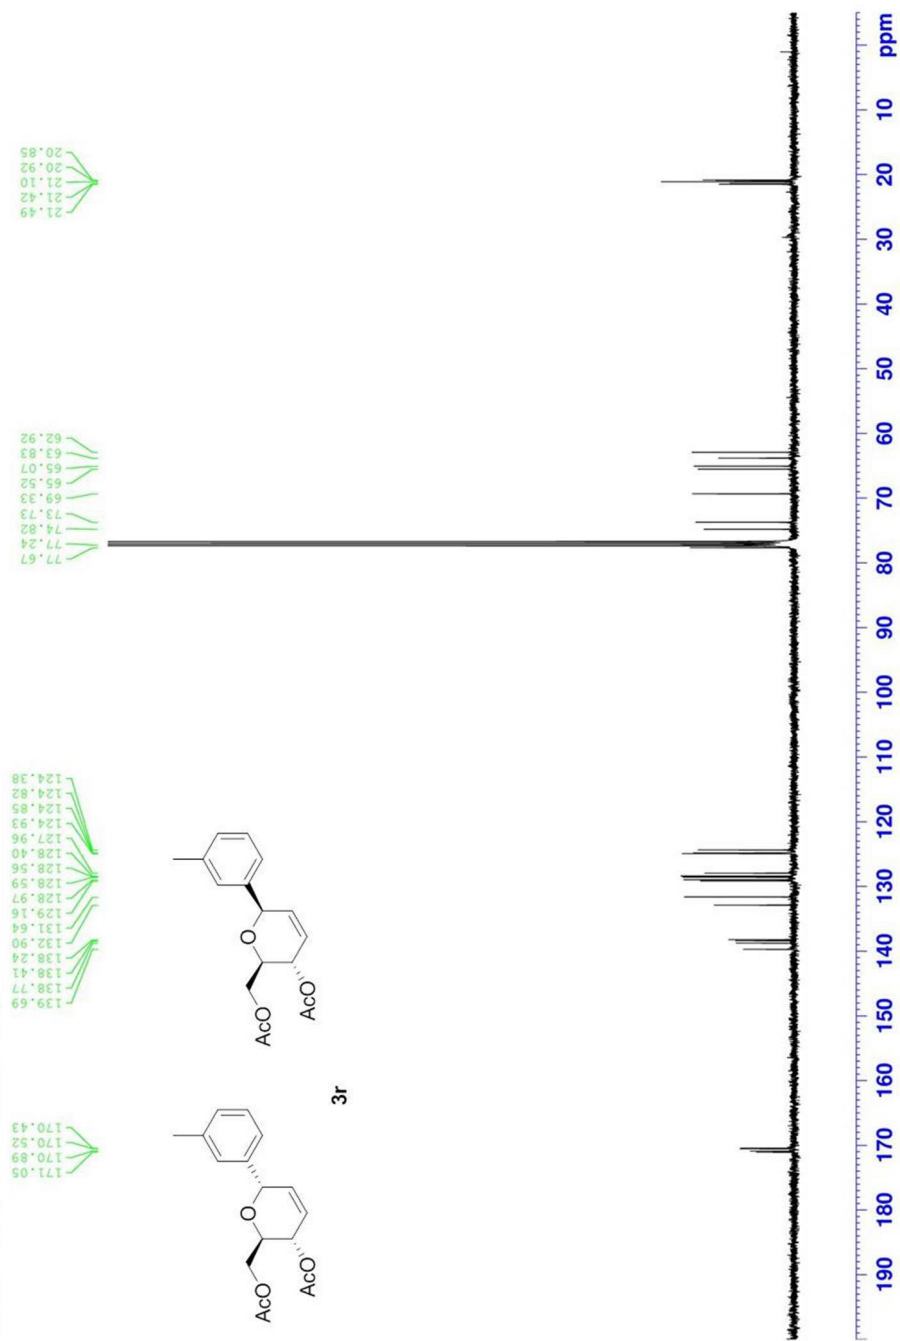

02-018-001, AV 400 MHz, <sup>1</sup>H NMR, CDCl<sub>3</sub>

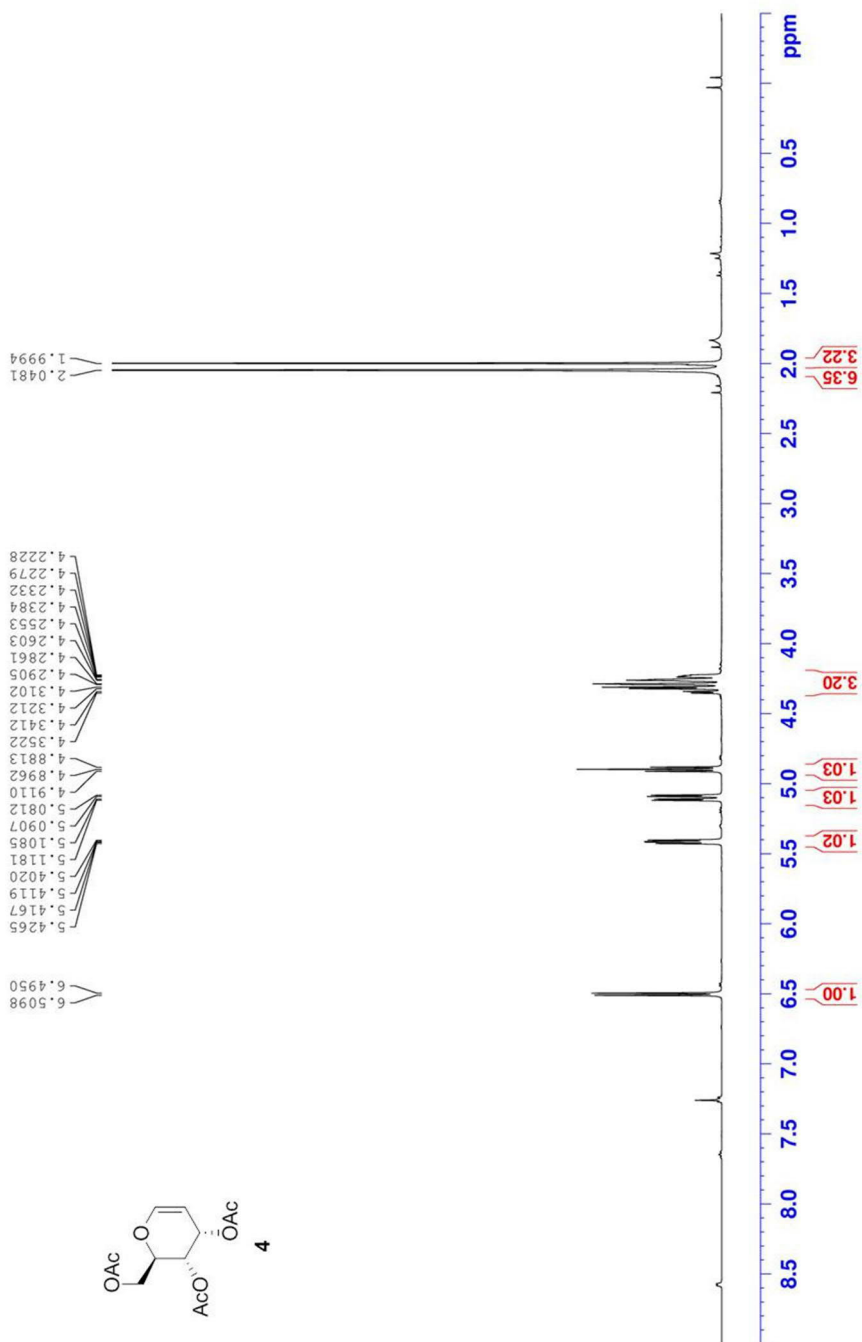

02-018-001, AV 400 MHz, <sup>13</sup>C NMR, CDCl<sub>3</sub>

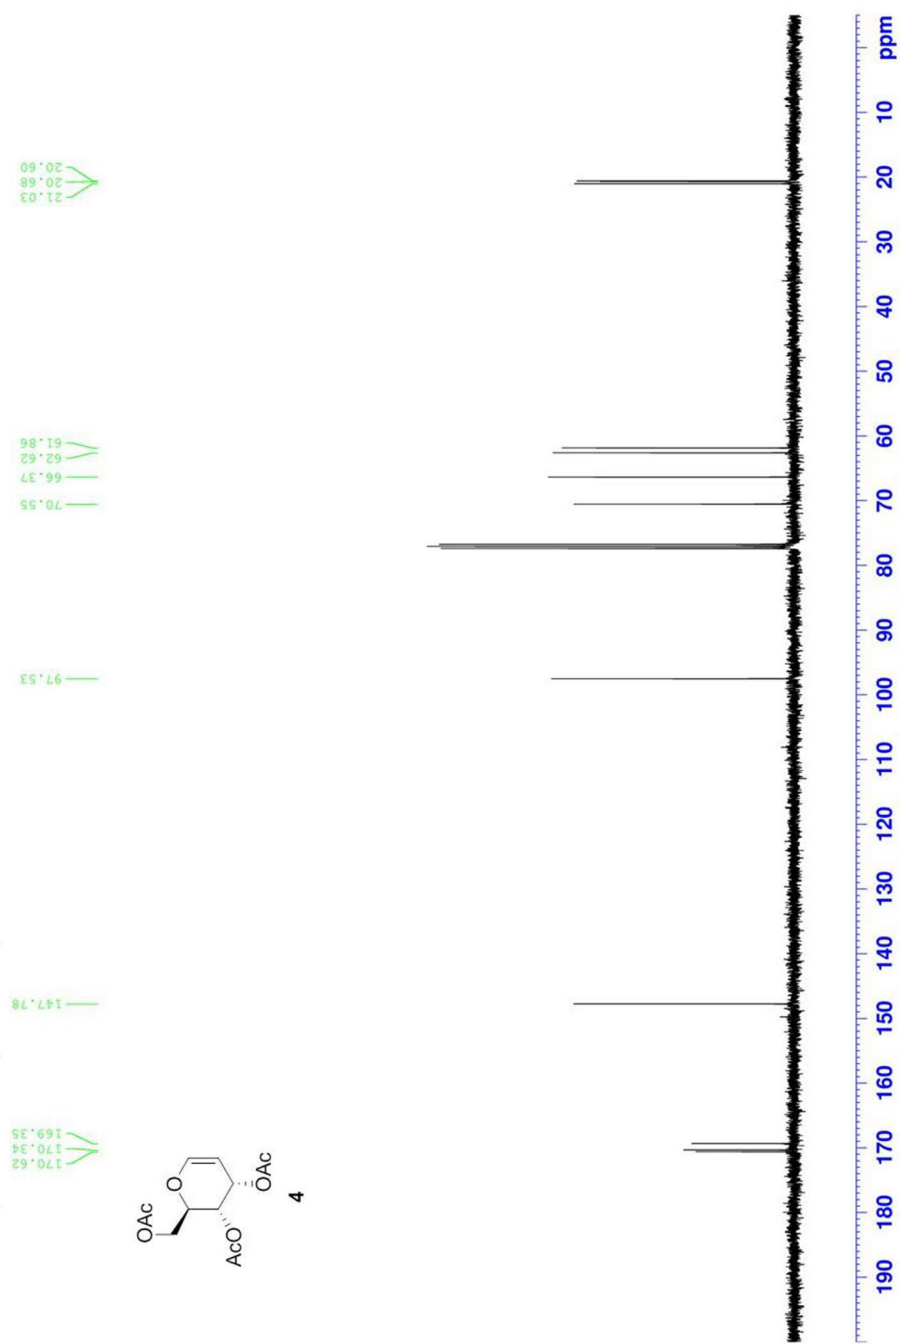

Supplement: Supplementary file 1 [file 4019182]
